Running head: VISUAL MODULATION OF A1 RECEPTIVE FIELDS

1 **Title page**

2 Title: Visual modulation of spectrotemporal receptive fields in mouse auditory cortex

3

4 Author names and affiliations:

5 James Bigelow<sup>1,3</sup>, Ryan J. Morrill<sup>1,2,3</sup>, Timothy Olsen<sup>1,3</sup>, Stephanie N. Bazarini<sup>1,3</sup>, Andrea R.  
6 Hasenstaub<sup>1,2,3</sup>

7 <sup>1</sup>Coleman Memorial Laboratory

8 <sup>2</sup>Neuroscience Graduate Program

9 <sup>3</sup>Department of Otolaryngology–Head and Neck Surgery, University of California, San  
10 Francisco, 94143

11

12 Corresponding author:

13 Dr. Andrea R. Hasenstaub

14 Sandler Neurosciences Center

15 Department of Otolaryngology–Head and Neck Surgery

16 675 Nelson Rising Lane

17 Box 0444

18 University of California, San Francisco

19 San Francisco, CA 94143

20

21 Acknowledgements:

22 This work was supported by National Institutes of Health grants F32DC016846 to J.B and

23 R01DC014101, R01NS116598, R01MH122478, and R01EY025174 to A.R.H., the National

24 Science Foundation GRFP to R.J.M., the Klingenstein Foundation to A.R.H., Hearing Research

25 Inc. to A.R.H., PBBR Breakthrough Fund to A.R.H., and the Coleman Memorial Fund to A.R.H.

## Running head: VISUAL MODULATION OF A1 RECEPTIVE FIELDS

### 26 **Abstract**

27

28 Recent studies have established significant anatomical and functional connections between  
29 visual areas and primary auditory cortex (A1), which may be important for perceptual processes  
30 such as communication and spatial perception. However, much remains unknown about the  
31 microcircuit structure of these interactions, including how visual context may affect different cell  
32 types across cortical layers, each with diverse responses to sound. The present study examined  
33 activity in putative excitatory and inhibitory neurons across cortical layers of A1 in awake male  
34 and female mice during auditory, visual, and audiovisual stimulation. We observed a  
35 subpopulation of A1 neurons responsive to visual stimuli alone, which were overwhelmingly  
36 found in the deep cortical layers and included both excitatory and inhibitory cells. Other neurons  
37 for which responses to sound were modulated by visual context were similarly excitatory or  
38 inhibitory but were less concentrated within the deepest cortical layers. Important distinctions in  
39 visual context sensitivity were observed among different spike rate and timing responses to  
40 sound. Spike rate responses were themselves heterogeneous, with stronger responses evoked  
41 by sound alone at stimulus onset, but greater sensitivity to visual context by sustained firing  
42 activity following transient onset responses. Minimal overlap was observed between units with  
43 visual-modulated firing rate responses and spectrotemporal receptive fields (STRFs) which are  
44 sensitive to both spike rate and timing changes. Together, our results suggest visual information  
45 in A1 is predominantly carried by deep layer inputs and influences sound encoding across  
46 cortical layers, and that these influences independently impact qualitatively distinct responses to  
47 sound.

48

### 49 **Significance statement**

50

51 Multisensory integration is ubiquitous throughout the brain, including primary sensory cortices.  
52 The present study examined visual responses in primary auditory cortex, which were found in  
53 both putative excitatory and inhibitory neurons and concentrated in the deep cortical layers.  
54 Visual-modulated responses to sound were similarly observed in excitatory and inhibitory  
55 neurons but were more evenly distributed throughout cortical layers. Visual modulation  
56 moreover differed substantially across distinct sound response types. Transient stimulus onset  
57 spike rate changes were far less sensitive to visual context than sustained spike rate changes  
58 during the remainder of the stimulus. Spike timing changes were often modulated independently  
59 of spike rate changes. Audiovisual integration in auditory cortex is thus diversely expressed  
60 among cell types, cortical layers, and response types.

61 **Introduction**

62

63 Evidence accumulated within recent decades demonstrates that primary auditory cortex (A1) is  
64 not exclusively involved in processing sound. Instead, A1 integrates information carried by  
65 projections from multiple sensory and motor areas with input from the ascending auditory  
66 pathway (Schneider and Mooney, 2018; King et al., 2019). For many species including humans,  
67 monkeys, and mice, visual projections comprise a particularly dense source of input to A1  
68 (Banks et al., 2011). This likely reflects the tendency of environmental features and events to be  
69 simultaneously transduced by the auditory and visual modalities, thus giving rise to audiovisual  
70 perceptual processes such as spatial localization and communication. Consistent with these  
71 observations, physiological studies have found that sound-evoked responses may be modulated  
72 by simultaneously presented visual stimuli, either increasing or decreasing firing rates relative to  
73 sound alone (Bizley and King, 2008; Kayser et al., 2009).

74 Most physiological studies of audiovisual integration in A1 have not investigated  
75 potential differences among cortical layers and cell types (e.g., excitatory vs. inhibitory). This is  
76 surprising, as an essential aspect of cortical organization is its division into layers, each with  
77 distinct cell type compositions and connectivity patterns with cortical and subcortical structures.  
78 Consistent with these anatomical differences, numerous studies in A1 have reported differences  
79 in sound encoding properties of neurons across cortical layers (Atencio et al., 2009) and cell  
80 types (Atencio and Schreiner, 2008; Phillips et al., 2017b). These findings raise the possibility  
81 that multisensory integrative properties of A1 might similarly vary by cortical layer and cell type.  
82 Indeed, a recent study from our lab found that a subset of neurons in mouse A1 were  
83 responsive to visual flash stimuli, and that these neurons were concentrated in the infragranular  
84 layers (Morrill and Hasenstaub 2018). However, this study left open the question of whether  
85 neurons with audiovisual integrative responses, such as visual-modulated responses to sound  
86 or responses to both modalities, are distributed in parallel with the infragranular visual-  
87 responsive neurons. Similarly, whether unimodal visual responses or audiovisual integrative  
88 responses differ between neuron types (excitatory, inhibitory) remains to be investigated.

89 With few exceptions (Kayser et al., 2010; Atilgan et al., 2018), studies examining  
90 multisensory integration in A1 and elsewhere have relied on changes in time-averaged spike  
91 rates to quantify integrative effects. However, neurons throughout the auditory pathway may  
92 encode sound features and other events through changes in spike timing, rate, or both  
93 (deCharms and Merzenich 1996; Malone et al., 2010; Insanally et al., 2019). Capturing both  
94 spike rate and timing changes in A1 may be fundamental to understanding audiovisual  
95 integration for two reasons. First, neurons with spike timing changes alone are common in A1,  
96 in some preparations reflecting the majority (Insanally et al., 2019). Thus, focusing on spike-rate  
97 changes alone may underestimate the prevalence or strength of multisensory integrative  
98 activity. Second, downstream targets of A1 may be differently influenced by spike rate and  
99 timing changes. Capturing spike timing effects may therefore provide insight into multisensory  
100 processes in structures receiving projections from A1.

101 Spike-rate changes are themselves multifaceted and may include transient firing  
102 changes at stimulus onset or offset, as well as sustained changes throughout the stimulus  
103 period (Lu et al., 2001; Wang et al., 2005; Malone et al., 2015). These diverse response types  
104 may reflect distinct network states (Churchland et al., 2010) and sources of information from the

## Running head: VISUAL MODULATION OF A1 RECEPTIVE FIELDS

105 ascending auditory pathway (Liu et al., 2019). Resolving potential differences in multisensory  
106 integrative properties among response types may be similarly fundamental to understanding the  
107 nature and extent of multisensory integration in A1.

108 The current study examined single unit responses in awake mouse A1 to auditory,  
109 visual, and audiovisual stimulation. High-density multichannel electrode arrays enabled cortical  
110 depth estimation for each neuron and physiological features permitted classification of putative  
111 excitatory and inhibitory units. Broadband receptive field estimation stimuli delivered in  
112 segments enabled measurement of both transient onset and sustained firing rate responses, as  
113 well spectrotemporal receptive fields (STRFs), which are sensitive to both spike rate and timing  
114 changes.

115

### 116 **Materials and Methods**

117

#### 118 *Subjects and surgical preparation*

119

120 All procedures were approved by the Institutional Animal Care and Use Committee at the  
121 University of California, San Francisco. A total of 15 adult mice (6 female) served as subjects  
122 (median age 99 days, range 58–169 days). All mice had a C57BL/6 background and expressed  
123 optogenetic effectors targeting interneuron subpopulations, which were not manipulated in the  
124 current experiment. Mice were housed in groups of two to five under a 12H-12H light-dark cycle.  
125 Surgical procedures were performed under isoflurane anesthesia with perioperative analgesics  
126 (lidocaine, meloxicam, and buprenorphine) and monitoring. A custom stainless steel headbar  
127 was affixed to the cranium above the right temporal lobe with dental cement, after which  
128 subjects were allowed to recover for at least two days. Prior to electrophysiological recording, a  
129 small craniotomy (~1–2 mm diameter) centered above auditory cortex (~2.5–3.5 mm posterior  
130 to bregma and under the squamosal ridge) was made within a window opening in the headbar.  
131 The craniotomy was then sealed with silicone elastomer (Kwik-Cast, World Precision  
132 Instruments). The animal was observed until ambulatory (~5–10 min) and allowed to recover for  
133 a minimum of 2 h prior to electrophysiological recording. The craniotomy was again sealed with  
134 silicone elastomer at the conclusion of recording, and the animal was housed alone thereafter.  
135 Electrophysiological recordings were conducted for each animal on up to five consecutive days  
136 following the initial craniotomy procedure.

137

#### 138 *Auditory and visual stimuli*

139

140 All stimuli were generated in MATLAB (Mathworks) and delivered using Psychophysics Toolbox  
141 Version 3 (Kleiner et al., 2007). Sounds were delivered through a free-field electrostatic speaker  
142 (ES1, Tucker-Davis Technologies) approximately 15–20 cm from the left (contralateral) ear  
143 using an external soundcard (Quad Capture, Roland) at a sample rate of 192 kHz. Sound levels  
144 were calibrated to  $60 \pm 5$  dB at ear position (Model 2209 meter, Model 4939 microphone, Brüel  
145 & Kjær). Visual stimuli were presented on a 19-inch LCD monitor with a 60 Hz refresh rate  
146 (ASUS VW199 or Dell P2016t) centered 25 cm in front of the mouse. Monitor luminance was  
147 calibrated to 25 cd/m<sup>2</sup> for 50% gray at eye position.

## Running head: VISUAL MODULATION OF A1 RECEPTIVE FIELDS

148 For the majority of recordings, search stimuli used for cortical depth estimation included  
149 click trains, noise bursts, and pure tone pips, plus the experimental stimuli described below. For  
150 a small minority of recordings, only tone pips and experimental stimuli were presented due to  
151 time constraints. In some recordings, additional search stimuli were presented, such as  
152 frequency-modulated sweeps. Click trains comprised broadband 5 ms non-ramped white noise  
153 pulses presented at 4 Hz for 1 s at 60 dB with a ~1 s interstimulus interval (ISI), with 20–50  
154 repetitions. Noise bursts consisted of 50 ms non-ramped band-passed noise with a uniform  
155 spectral distribution between 4 and 64 kHz presented at 60 dB in 500 unique trials with a ~350  
156 ms ISI. Pure tones consisted of 100 ms sinusoids with 5-ms cosine-squared onset/offset ramps  
157 presented at a range of frequencies (4–64 kHz, 0.2 octave spacing) and attenuation levels (30–  
158 60 dB, 5 dB steps). Three repetitions of each frequency-attenuation combination were  
159 presented in pseudorandom order with an ISI of ~550 ms. Peristimulus-time histograms  
160 (PSTHs) quantifying time-binned multi-unit firing rates were constructed for each stimulus. For  
161 tone pips, frequency-response area (FRA) functions were constructed from baseline-subtracted  
162 spike counts during the stimulus period averaged across trials at each frequency-attenuation  
163 combination. PSTHs and FRAs from an example recording are shown in **Figure 1C**.

164 As depicted by **Figure 1E**, experiments comprised two trial types: (a) Auditory trials,  
165 which presented sound only, and (b) Audiovisual trials, which included both sound and visual  
166 stimuli. For both trial types, the auditory stimulus was a random double sweep (RDS), a  
167 continuous, spectrally sparse receptive field estimation stimulus capable of effectively driving  
168 activity across diversely tuned neurons in A1 (Gourévitch et al., 2015). The RDS comprised two  
169 uncorrelated random sweeps, each varying continuously and smoothly over time between 4 and  
170 64 kHz, with a maximum sweep modulation frequency of 20 Hz. Sample RDS frequency vectors  
171 are depicted in **Figure 1E** and **Figure 4A, a**. The RDS was delivered in 15-s non-repeating  
172 segments (40 trials, 10 minutes total stimulation; cf. Rutkowski et al., 2002). The inter-sound  
173 interval was ~9 s, with visual stimuli trailing and leading sounds within this interval. Thus,  
174 intertrial intervals were ~9 s for consecutive auditory trials, ~4 s for consecutive audiovisual  
175 trials, and ~6.5 seconds for mixed trial type sequences. The same 40 RDS segments were used  
176 for Auditory and Audiovisual trials to maintain identical stimulus statistics between conditions.  
177 Audiovisual trials were thus identical to Auditory trials with the exception of an additional  
178 contrast modulated visual noise stimulus.

179 As described in detail elsewhere (Niell and Stryker, 2008), CMN is a broadband stimulus  
180 designed to drive as many primary visual cortical neurons as possible. The stimulus is  
181 generated by first creating a random frequency spectrum in the Fourier domain. The temporal  
182 frequency spectrum was flat with a low-pass cutoff at 10 Hz. The spatial frequency spectrum  
183 dropped off as  $A(f) \sim 1/(f+f_c)$ , with  $f_c = 0.05$  cycles/°. A spatiotemporal movie was then created  
184 by inverting the three-dimensional spectrum. Finally, contrast modulation was imposed by  
185 multiplying the movie by a sinusoidally variable contrast function. The CMN stimulus was  
186 generated at 60×60 pixels, then interpolated to 900×900 pixels. The first and last frames of the  
187 CMN movie were uniform 50% gray, providing abrupt luminance changes at stimulus onset and  
188 offset from black during the intertrial interval. The CMN stimulus led and trailed the RDS sounds  
189 by 2.5 s to allow ample time for potential visual-evoked spiking responses to reach an adapted  
190 state prior to sound onset responses and persist throughout sound offset responses.

Running head: VISUAL MODULATION OF A1 RECEPTIVE FIELDS

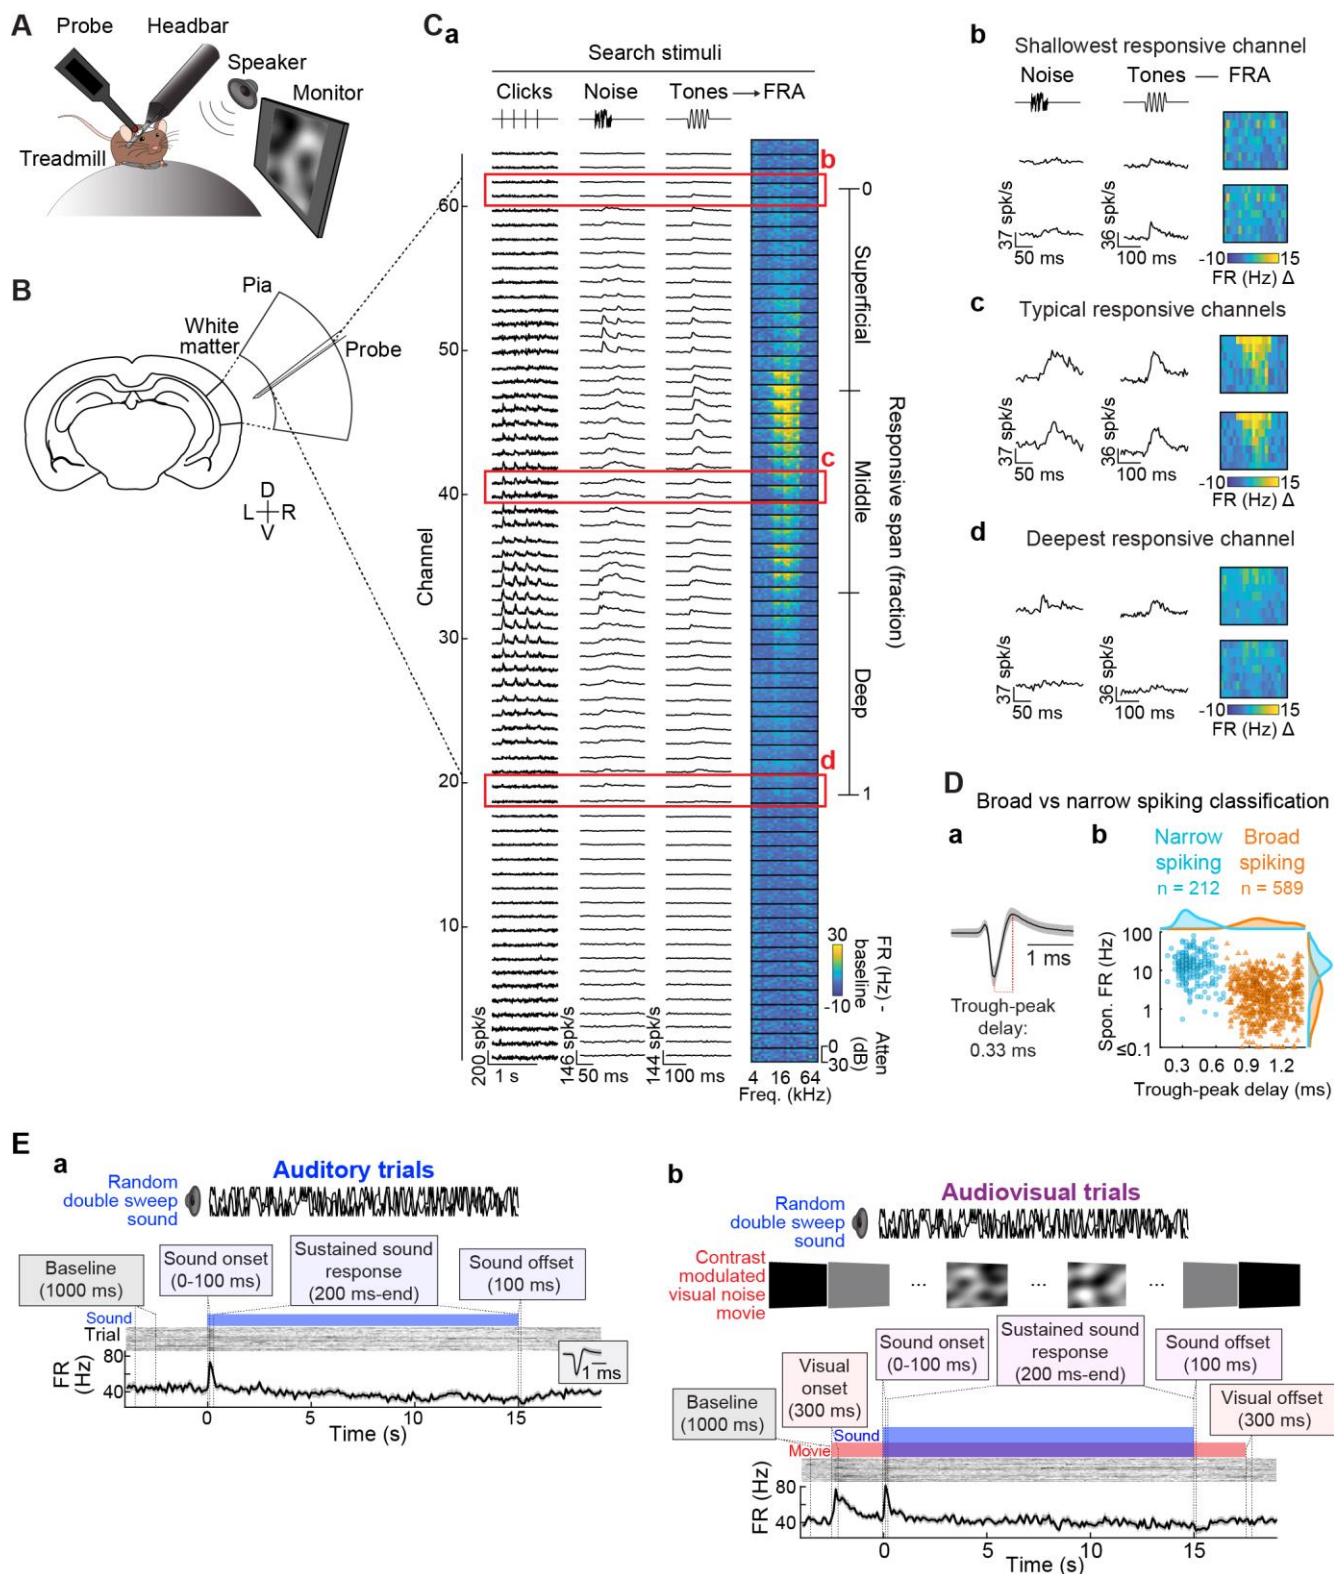

191  
192

## Running head: VISUAL MODULATION OF A1 RECEPTIVE FIELDS

**Figure 1.** Single unit recording and audiovisual stimulation in awake mouse auditory cortex. **(A)** Mice were head fixed atop a spherical treadmill. A headbar window provided access to primary auditory cortex (A1) of the right hemisphere for extracellular recording with translaminar probes. Sounds were presented to the contralateral ear through an electrostatic speaker and visual stimuli were presented via a monitor centered in front of subjects at 25 cm distance. **(B)** Coronal mouse brain section with magnification of A1 and linear multichannel electrode arrays (64-channels, 20 $\mu$ m spacing) used to simultaneously record neuronal activity across all cortical layers. **(C)** Auditory cortical depth estimation. **(a)** Multiunit responses evoked by search stimuli (e.g., click trains, noise bursts, pure tones) were used to guide visual demarcation of the span of responsive channels which served as an estimate of the putative cortical span and was used to assign a fractional depth value to each recorded neuron. Fractional responsive span was further divided into Superficial, Middle, and Deep bins. **(b–d)** Example multiunit responses from **(b)** the shallowest channel of the responsive span, **(c)** responsive channels from the middle of the probe, and **(d)** deepest channel of the responsive span. **(D)** Identification of putative excitatory and inhibitory neurons by waveform morphology clustering. **(a)** Example single-unit waveform (black line: median, gray shading: median absolute deviation) showing trough-peak delay calculation. **(b)** The distribution of trough-peak delay times was sharply bimodal, permitting straightforward identification of broad spiking (BS; putative excitatory) and narrow spiking (NS; putative inhibitory) neurons. BS and NS unit populations were further distinguished by differences in spontaneous firing rate. **(E)** Auditory and visual stimulation paradigm. **(a)** Auditory trials comprised non-repeating 15-s segments of a random double sweep (RDS) stimulus, comprising two continuously frequency-modulated pure tones which varied independently of one another between 4 and 64 kHz. Trials were separated by silent intertrial intervals (~4–9 s), permitting calculation of spontaneous firing rates. Sound onset firing rate responses were defined by a 100-ms window post-stimulus onset. Sustained firing rates were quantified within a window 200-ms post-stimulus onset to the end of the stimulus (15 s). Inset shows the example unit spike waveform (median  $\pm$  MAD). **(b)** Audiovisual trials were identical to Auditory trials (including the same RDS segments) with the addition of a visual contrast modulated noise (CMN) stimulus. The CMN stimulus led and trailed the RDS stimulus by 2.5 s, permitting unambiguous assessment of visual onset and offset firing rate responses and allowing adaptation to the visual stimulus prior to sound onset. The auditory (RDS) and visual (CMN) stimuli were uncorrelated with each other. Auditory and Audiovisual trials were interleaved in pseudorandom order.

### 193 *Electrophysiology*

194

195 Recordings were conducted inside a sound attenuation chamber (Industrial Acoustics  
196 Company). Anesthesia has well known and profound influences on auditory cortical encoding,  
197 including the relative prevalence of onset and sustained firing rate responses (Wang et al.,  
198 2005). Recordings were thus conducted in awake, headfixed animals moving freely atop a  
199 spherical treadmill in **Figure 1A** (Dombeck et al., 2007; Niell and Stryker, 2010; Phillips and  
200 Hasenstaub, 2016; Phillips et al., 2017a, 2017b; Morrill and Hasenstaub, 2018; Bigelow et al.,  
201 2019). The silicone elastomer filling the craniotomy was removed and a single shank, linear  
202 multichannel electrode array (Cambridge Neurotech) was slowly lowered into cortex using a  
203 motorized microdrive (FHC). Arrays with 64 channels (20  $\mu$ m site spacing, 1260  $\mu$ m total span)  
204 were used for all recordings except one, which used a 32-channel array (25  $\mu$ m site spacing,  
205 775  $\mu$ m total span). Prior to lowering the probe, the craniotomy was filled with 2% agarose to  
206 stabilize the brain surface. After reaching depths of approximately 800–1000  $\mu$ m below the first  
207 observation of action potentials, probes were allowed to settle for at least 20 mins before  
208 initiating recording. Continuous extracellular voltage traces were collected using an RHD2000  
209 (Intan Technologies) at a sample rate of 30 kHz. Other experimental events such as stimulus  
210 event times were stored concurrently by the same system.

## Running head: VISUAL MODULATION OF A1 RECEPTIVE FIELDS

211 The span of recording channels (1260  $\mu\text{m}$ ) exceeded mouse cortical depth ( $\sim 800 \mu\text{m}$ ;  
212 Paxinos and Franklin, 2019), resulting in a majority of sound-responsive channels plus an  
213 additional subset of channels recorded outside of A1. As depicted in **Figure 1C**, multi-unit  
214 responses evoked by search stimuli (e.g., click trains, noise bursts, tone pips) were used to  
215 guide visual demarcation of the range of sound-responsive channels, which served as an  
216 estimate of cortical span. Although penetrations were approximately perpendicular to the  
217 cortical surface, it was impractical to achieve perfect orthogonality. Thus, the responsive span of  
218 each recording was normalized such that each channel was expressed as a fraction of total  
219 depth (Morrill and Hasenstaub, 2018). We note that this cortical depth estimation procedure is  
220 less precise than our prior study, in which Di-I was applied to the probe for histologically  
221 referenced depth estimation (Morrill and Hasenstaub, 2018). Nevertheless, we observed parallel  
222 depth distributions of visual responsive neurons in the current and prior studies, suggesting the  
223 current method achieved a rough approximation to the histological approach. However, due to  
224 the lack of histological verification, a more conservative depth categorization approach was  
225 adopted, dividing the responsive span into three equal bins reflecting superficial, middle, and  
226 deep-layer neuron populations.

227 Recordings targeted A1 using stereotaxic coordinates and anatomical landmarks such  
228 as characteristic vasculature patterns (Joachimsthaler et al., 2014). Previous studies have  
229 reported significant differences in tone onset latencies between primary and non-primary  
230 auditory cortical fields (Joachimsthaler et al., 2014), with latencies between 5 and 18 ms for  
231 primary fields (median  $\sim 9$  ms), and 8–32 ms for non-primary fields (median  $\sim 12$ –16 ms). Thus,  
232 tone onset latencies were used to support designations of putative primary recording sites.  
233 PSTHs were constructed from multi-unit activity (negative threshold crossings exceeding 4.5  
234 median absolute deviations of the continuous voltage trace distribution) using 2-ms bins and  
235 smoothed with a Savitzky-Golay filter (3rd order, 10-ms window). Onset latency was defined as  
236 the first post-stimulus bin in which the firing rate exceeded 2.5 standard deviations of the pre-  
237 stimulus firing rate bins (Morrill and Hasenstaub, 2018). Recordings for which the median  
238 latency across the responsive channel span was 14 ms or less were considered putative  
239 primary sites and retained for further analysis (49 of 60 total recordings). The retained putative  
240 primary recordings universally exhibited robust multi-unit responses to click trains, noise bursts,  
241 and tone pips, and clear evidence of frequently-level tuning in the FRA plots (**Figure 1C**) as well  
242 as spectrotemporal tuning in single-unit responses to RDS stimuli (**Figure 4**).

243 Single-unit activity was isolated from continuous multichannel traces using Kilosort 2.0  
244 (Pachitariu et al., 2016; available: <https://github.com/MouseLand/Kilosort>) and further validated  
245 by auto- and cross-correlation analysis, refractory period analysis, and cluster isolation  
246 statistics. Although the majority of isolated units were held throughout the entire recording ( $\sim 28$   
247 minutes), isolation of individual neurons was occasionally disrupted and lost partway through  
248 the experiment. Thus, the active timespan for each unit was estimated by visual demarcation of  
249 unit activity plots over time. Inactive trials were discarded from further analysis. For the  
250 remaining subset of active trials, RDS stimuli were matched between conditions by only using  
251 available RDS segments common to both conditions. This ensured strict equivalence of auditory  
252 stimuli between conditions, isolating any observed differences to the presence of the visual  
253 CMN stimulus. Only units with 10 or more active trials (5 per condition) were retained for final  
254 analysis. A total of 801 units were included in the analyses below. As in previous publications



## Running head: VISUAL MODULATION OF A1 RECEPTIVE FIELDS

255 (Phillips et al., 2017; Bigelow et al., 2019), units were classified as narrow-spiking (NS;  
256 expected to be overwhelmingly inhibitory) or broad-spiking (BS; expected to be mainly  
257 excitatory) on the basis of a clear bimodal distribution of waveform trough-peak delays (**Figure**  
258 **1D**; NS, <600  $\mu$ s,  $n = 212$ ; BS,  $\geq 600$   $\mu$ s,  $n = 589$ ). Consistent with this classification, NS units  
259 had characteristically higher spontaneous firing rates than BS units (estimated from baseline  
260 period shown in **Figure 1E, a**;  $F = 391.31$ ,  $p < 10^{-70}$ ,  $\eta^2 = 0.329$ ).

261  
262 *Spectrotemporal receptive field estimation*

263  
264 Spectrotemporal fields (STRFs) were estimated using standard reverse-correlation techniques  
265 (Wu et al., 2006) as depicted in **Figure 4A, a–c**. RDS stimuli were discretized in 1/8 oct  
266 frequency bins and 5-ms time bins, which is sufficient resolution for modeling response  
267 properties in the majority of A1 neurons (Thorson et al., 2015). The spike-triggered average  
268 (STA) was obtained by adding the discretized stimulus segment preceding each spike to a  
269 cumulative total, and then dividing by the total spike count. For all data analyses, the peri-spike  
270 time analysis window spanned 0–100 ms prior to spike event times, sufficient for capturing the  
271 full latency-adjusted temporal response periods of the majority of A1 neurons (Atencio and  
272 Schreiner 2013, See et al., 2018). A broader window was used for display purposes, spanning  
273 200 ms before and 50 ms after spike event times. The 50 ms post-spike window was included  
274 as a visualization of estimated acausal values, i.e., those that would be expected by chance  
275 given the finite recording time, stimulus and spike timing statistics, and smoothing parameters  
276 (Gourévitch et al. 2015). The first 200 ms of the RDS response from each trial were dropped  
277 from all STA calculations analyses to minimize bias reflecting strong onset transients.

278 The STA thus reflects the average binned stimulus segment preceding spike events and  
279 can be viewed as a linear approximation to the optimal stimulus for driving neuronal firing  
280 (deCharms and Merzenich, 1998). As discussed by Rutkowski et al. (2002), the STA can be  
281 formalized as the probability ( $P$ ) of a stimulus frequency  $f$  occurring at time  $t-\tau$  given that a spike  
282 occurred, as expressed by the equation

$$283$$
$$284 \quad P(S[f, \tau]|i) = (\sum_i^n S(f, t_i - \tau) \cdot \delta(t_i)) / n \quad \text{Eq. (1)}$$
$$285$$

286 where  $i$  indicates a spike,  $t_i$  is a spiketime,  $\tau$  is the time analysis window,  $n$  is the spike count,  
287 and  $\sum$  indicates summing across spikes.  $S(f, t)$  is the stimulus value at a given time-frequency  
288 bin, equaling one if an RDS frequency intersects the bin, two if both RDS frequencies coincide  
289 with the bin, and zero otherwise.  $S(f, t-\tau)$  represents the windowed stimulus aligned to a spike  
290 time.  $\delta(t_i)$  is equal to one if a spike occurs at time  $t_i$  and zero otherwise. With a slight  
291 modification, STRF time-frequency bins can be expressed in terms of deviation from mean  
292 driven firing rate (spikes/s - mean) using the terms defining the STA and Bayes' theorem,  
293

$$294 \quad P(i|S[f, \tau]) = P(S[f, \tau]|i) \cdot P(i) / P(S[f]) \quad \text{Eq. (2)}$$
$$295$$

296 where  $P(i)$  is the probability of a spike occurring in a bin, equal to  $n_i/T$ , where  $T$  is the total  
297 stimulus time and  $P(S[f])$  is the probability of a tone frequency occurring in a bin. The mean  
298 driven firing rate is then subtracted from the STRF such that individual time-frequency bins

## Running head: VISUAL MODULATION OF A1 RECEPTIVE FIELDS

299 reflect increases (positive, red) or decreases (negative, blue) from the mean driven rate (**Figure**  
300 **4A, c**). Finally, the STRF is smoothed by a uniform 3×3 bin window to reduce overfitting to  
301 finite-sampled stimulus statistics. The STA and STRF expressed in units of spikes/s are  
302 multiples of each other since terms in the expression  $P(i)/P(S[f])$  are constant and thus nearly  
303 identical for the purposes of all data analyses, including comparisons between conditions.  
304 However, we opt to report STRFs represented in firing-rate change units to facilitate  
305 interpretation of stimulus driven changes in neuronal activity.

306 In addition, ‘Null’ STRFs were calculated using identical procedures to those described  
307 above except that the stimulus was reversed in time, while preserving the original spike event  
308 times. This modification breaks the temporal relationship between the stimulus and spike times,  
309 but preserves spike count and timing statistics (e.g., interspike interval distribution), as well as  
310 the statistical distributions of the stimulus (Bigelow and Malone, 2017). The resulting STRF was  
311 used to estimate time-frequency bin values expected by chance within the constraints of finite  
312 spike counts and stimulus time.

313 STRFs were calculated independently for each condition. As in previous studies (Fritz et  
314 al., 2003), a difference STRF, which we refer to throughout as  $\Delta$ STRF, was calculated by  
315 subtracting the STRF obtained from Auditory trials from the STRF obtained from Audiovisual  
316 trials. A Null  $\Delta$ STRF was similarly obtained by subtracting Null Auditory STRF from the Null  
317 Audiovisual STRF.

318  
319 *Mutual information analysis*

320  
321 Although the STRF effectively captures the spectrotemporal tuning of a neuron, it does not  
322 reveal the degree to which driven spiking activity is dependent upon similarity between the  
323 stimulus and receptive field. For instance, it is not apparent how consistently spiking activity is  
324 observed when the stimulus closely approximates the STRF (e.g., RDS frequency vectors  
325 intersecting STRF excitatory subfields) and whether spiking is inhibited when the stimulus is  
326 anticorrelated or uncorrelated with the STRF (e.g., RDS frequency vectors intersecting STRF  
327 inhibitory subfields or regions with values near zero). Thus, mutual information was calculated to  
328 quantify the relationship between probability of firing and similarity between the stimulus and  
329 STRF according to previously published methodology (Atencio et al., 2008; Atencio and  
330 Schreiner, 2016).

331 As depicted by **Figure 12A**, mutual information reflects a scaled ratio of two  
332 distributions:  $P(x)$ , which reflects the ‘similarity’ between the STRF and all possible RDS  
333 segments in the experiment, and the other,  $P(x|\text{spike})$ , reflecting STRF-stimulus ‘similarity’  
334 values at time bins in which a spike occurred. Stimulus-STRF ‘similarity’ ( $x$ ) is operationally  
335 defined as the inner product (i.e., projection value) between the STRF and the stimulus segment  
336 of equivalent dimensions. Put another way, the STRF is convolved with the stimulus, yielding a  
337 projection value for each 5-ms time bin in the stimulus (**Figure 12A, a–c**). For ease of  
338 interpretation, raw projection values were standardized by subtracting the mean of the raw  $P(x)$   
339 distribution and dividing by its standard deviation. Thus, highly positive and negative  
340 standardized values reflect stimulus segments highly similar and dissimilar to the STRF,  
341 respectively. Values near zero imply a random relationship between the stimulus and STRF.  
342 The continuously valued projection values were separated into nine linearly spaced bins (**Figure**

## Running head: VISUAL MODULATION OF A1 RECEPTIVE FIELDS

343 **12A, d).** As in prior studies, the most extreme positive bin was dropped from the information  
344 calculation due to undersampling (the most extreme STRF-stimulus matches are rare), resulting  
345 in eight analyzed bins. Finally, mutual information (bits/spike) is calculated by the calculating  
346 log<sub>2</sub>-transformed ratio of  $P(x|spike)$  divided by  $P(x)$ , multiplying the result by  $P(x|spike)$ , and  
347 summing across bins. In equation form,  
348

$$349 \quad I = \int dx P(x|spike) \log_2 \left[ \frac{P(x|spike)}{P(x)} \right] \quad \text{Eq. (3)}$$

350

351 The information estimation procedure occasionally produced values of zero for a small  
352 minority of units, which were excluded from further information analyses. Information values  
353 were not calculated for units with <200 total spikes due to undersampling concerns. Intuitively,  
354 mutual information increases as the  $P(x)$  and  $P(x|spike)$  distributions diverge. For instance, if a  
355 given binned  $P(x)$  value is low but  $P(x|spike)$  is high, we conclude that the stimulus (and its  
356 associated 'similarity' value to the STRF) occurs infrequently but usually evokes a spiking  
357 response. Similarly, if  $P(x)$  is high but  $P(x|spike)$  is low, we infer that a regularly occurring  
358 stimulus typically inhibits spiking. In each scenario, the stimulus and response are thus mutually  
359 informative of one another. By contrast, if the binned  $P(x)$  and  $P(x|spike)$  values are similar  
360 (both high or low), the stimulus is not informative about spiking behavior.

361

### 362 *Statistical analysis*

363

364 Our stimulus design allowed measurement of unimodal and bimodal evoked firing-rate  
365 responses as well as stimulus-driven changes in spike timing (e.g., spike alignment with RDS  
366 stimulus features). As indicated by **Figure 1E, a**, baseline (spontaneous) firing rates were  
367 measured from a window spanning 3.5 to 2.5 s prior to sound onset (immediately preceding  
368 visual stimulus onset for audiovisual trials). Sound onset responses were measured from spikes  
369 occurring within the first 100 ms of the stimulus. Sustained firing rates were estimated within the  
370 same window used for STRF estimation, from 200 ms post stimulus onset to the end of the  
371 stimulus (15 s). All sound-evoked firing rate response windows and STRF calculations were  
372 identical between conditions. Visual onset responses were analyzed in a window spanning 300  
373 ms after the visual stimulus began. The wider window used to capture onset transients for visual  
374 compared to auditory stimuli accommodated the substantially longer response latencies typical  
375 of visual responses in A1 (Morrill and Hasenstaub, 2018).

376

377 Auditory and visual offset responses were similarly analyzed using 100- and 300-ms  
378 windows following stimulus offset, respectively. Unlike onset and sustained responses, offset  
379 responses required comparison against two baselines: first, the spontaneous window described  
380 above, and second, a window of equivalent duration (1 s) preceding the offset response (i.e.,  
381 the final second of the stimulus). Differences from the second baseline ensured offset  
382 responses were not merely carryover from a sustained response. In addition, 'significant' offset  
383 responses were required to be above or below both baselines (but not between them) to ensure  
384 offset responses did not simply reflect the return of a sustained firing rate change to  
385 spontaneous activity. The larger of the two p-values was used to assess significance of the  
386 offset response, and its associated baseline was used for calculating effect size described  
below.

## Running head: VISUAL MODULATION OF A1 RECEPTIVE FIELDS

387 For each unit, the significance of all firing rate responses was assessed by comparison  
388 to baseline Wilcoxon signed-rank tests (paired) using  $\alpha = 0.05$ . For all tests of individual unit  
389 significance, false discovery rate (FDR) was limited by implementing the Benjamini–Hochberg  
390 procedure with  $q = 0.05$  across the unit population (Benjamini and Hochberg, 1995). The  
391 adjusted p-values produced by the FDR procedure are used to indicate significance for each  
392 response type for all example unit plots throughout the manuscript. For a standardized measure  
393 of response strength that accommodated both increases and decreases in firing rate from  
394 baseline, we defined effect sizes as the absolute difference between the evoked and  
395 spontaneous firing rate means, divided by the standard deviation of the spontaneous firing rate.  
396 This facilitated interpretation of response deviations from chance reflecting different analysis  
397 windows, unit types.

398 Significant differences in firing rate between conditions (auditory, audiovisual) were  
399 similarly assessed with Wilcoxon signed-rank tests ( $\alpha = 0.05$ , Benjamini–Hochberg FDR  
400 correction with  $q = 0.05$ ), and effect sizes were estimated as the absolute difference between  
401 conditions divided by the standard deviation of the auditory condition.

402 To assess the significance of STRFs, we used a reliability index in which the correlation  
403 coefficient was calculated between two STRFs computed from random trial halves (**Figure 4A,**  
404 **c**; Escabí et al., 2014). Reliability was defined as the mean across 1000 iterations for both ‘data’  
405 (time-preserved stimulus) and ‘null’ (time-reversed stimulus) STRFs. A p-value was calculated  
406 reflecting the proportion of the null distribution exceeding the mean of the data distribution  
407 (**Figure 4A, e**). P-values equal to zero (cases where none of the null correlations exceeded the  
408 data mean) were adjusted to 0.000999 in reflection of the resolution permitted by the number of  
409 subsample iterations. Finally, the p-values were multiplied by two for an estimate of two-tailed  
410 significance and adjusted using Benjamini–Hochberg FDR correction ( $q = 0.05$ ). Because the  
411 null subsampled STRF distribution skewed negative for some units (i.e., null reliability index  $>$   
412  $0$ ), we further required STRF reliability  $>0.2$  in order to be considered ‘significant’. Similar to  
413 firing rate responses, STRF reliability effect sizes were estimated as the absolute difference  
414 between the data and null distributions, divided by the standard deviation of the null distribution.  
415 Significance of  $\Delta$ STRFs was assessed with the same approach, except using subsampled  
416  $\Delta$ STRF correlation distributions (**Figure 9A, a–b**).

417 Except where otherwise noted, tests of population-level differences (e.g., among units in  
418 superficial, middle, deep cortical depth bins) were assessed by independent one-way analysis  
419 of variance (ANOVA), using effect sizes described above as the dependent variable. For  
420 uniformity in presenting the results, we use the same approach for testing between two  
421 variables (e.g., differences between NS and BS units), wherein ANOVA and the Student’s  $t$ -test  
422 produce equivalent p-values with  $F = t^2$ .

423

## 424 Results

425

426 The current study examined visual-modulation of sound-evoked responses in awake mouse A1.  
427 By delivering a continuous auditory receptive field estimation stimulus in 15-s segments  
428 separated by silent intervals, we were able to capture both transient onset firing rate responses  
429 as well as sustained firing rate responses throughout the duration of the stimulus. By using  
430 reverse correlation methods, we were further able to estimate STRFs, which are simultaneously

## Running head: VISUAL MODULATION OF A1 RECEPTIVE FIELDS

431 sensitive to both spike rate and timing. Half of the trials included a continuous visual stimulus,  
432 enabling direct comparison of firing rate responses and STRFs between auditory alone and  
433 visual-modulated conditions. The visual stimulus both led and trailed the sound stimulus by 2.5  
434 seconds, further allowing measurement of averaged firing rate responses evoked by the visual  
435 stimulus alone.

436

437 *Some A1 neurons respond to visual stimulation alone*

438

439 Example visual-responsive units are shown in **Figure 2A–B**. Consistent with our earlier study  
440 examining visual-flash evoked responses in A1 (Morrill and Hasenstaub, 2018), we found that  
441 significant responses to the visual CMN stimulus were most prevalent in the deepest cortical  
442 depth bin (**Figure 2C**). Extending our previous work, we found that for a minority of units, visual  
443 responses reflected decreases in firing rate relative to baseline (e.g., **Figure 2B**). For a  
444 standardized measure of visual response strength that avoided overweighting units with high  
445 firing rates and accommodated both increases and decreases in firing rate from baseline, we  
446 defined effect sizes as the absolute difference between the evoked and spontaneous firing rate  
447 means, divided by the standard deviation of the spontaneous firing rate. One-way ANOVA  
448 confirmed that effect size of visual-evoked onset firing rate changes was significantly dependent  
449 upon cortical depth for both unit types, with the strongest responses in the deepest bin (NS:  $F =$   
450  $13.95$ ,  $p < 10^{-5}$ ,  $\eta^2 = 0.118$ ; BS:  $F = 7.62$ ,  $p < 10^{-3}$ ,  $\eta^2 = 0.025$ ).

451 Visual responses were detected in a larger percentage of NS units (15.6%) than BS  
452 units (7.8%), and visual responses were significantly stronger for NS units in the deepest  
453 cortical depth bin ( $F = 4.32$ ,  $p = 0.039$ ,  $\eta^2 = 0.016$ ). Differences were non-significant for the  
454 remaining depth bins (shallow:  $F = 0.25$ ,  $p = 0.619$ ,  $\eta^2 = 0.002$ ; middle:  $F = 0.29$ ,  $p = 0.593$ ,  $\eta^2 =$   
455  $0.001$ ). We conducted follow-up analyses to test whether the larger percentage of visual  
456 responsive NS units could be explained by their characteristically higher firing rates – and thus  
457 statistical power for detecting firing rate changes. Mean firing rates were calculated for each unit  
458 across audiovisual trials (including the full stimulus period plus spontaneous activity 1 s before  
459 and after the stimulus), producing population mean rates of 18.11 Hz for NS units and 4.45 Hz  
460 for BS units (**Extended Data Figure 2-1A, a**). By randomly subsampling spikes from NS units  
461 with firing rates above the BS mean, we created a pseudo-population of NS units with mean  
462 firing rate equivalent to BS units (4.45 Hz; **Extended Data Figure 2-1A, b**). Visual onset  
463 response data were recalculated, including the p-value distribution which was readjusted by the  
464 Benjamini–Hochberg FDR procedure. As seen in **Extended Data Figure 2-1B**, differences in  
465 visual response effect sizes were non-significant for all depth bins (all F-ratios  $< 1.4$ , all p-values  
466  $> 0.24$ ). Thus, visual responses were observed in both NS and BS units, but any differences  
467 between these unit subpopulations may have reflected inherent differences in firing rate.

468 Because stimulus offset responses have been observed in primary visual cortex (Liang  
469 et al., 2008), we also examined the possibility of significant firing rate changes following  
470 termination of the visual CMN stimulus in the current study. However, after FDR correction, we  
471 found that there were no units with significant visual offset responses. We therefore relied on  
472 visual onset responses throughout the remainder of the analyses to define visual responsive  
473 units.

## Running head: VISUAL MODULATION OF A1 RECEPTIVE FIELDS

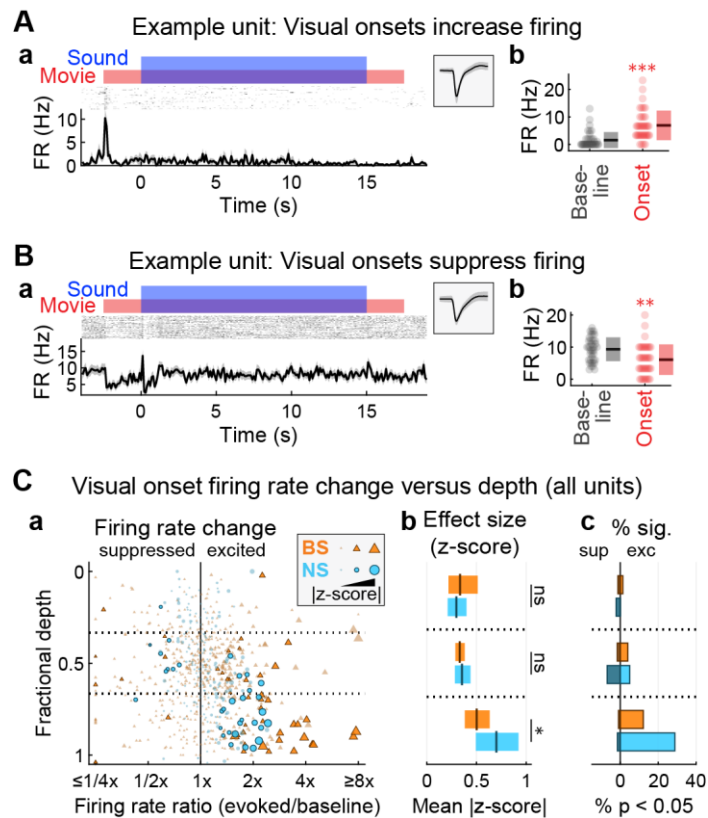

**Figure 2.** Some primary auditory cortical neurons respond to visual stimulation alone. **(A)** Example unit with an excitatory visual onset response. **(a)** Spiking responses quantified by peristimulus time histograms (lower) and binned-spike count matrices (upper) with blue and red bars indicating auditory and visual stimulus intervals, respectively (temporal binning: 100 ms). Inset shows the unit spike waveform (median  $\pm$  MAD). **(b)** Summary of visual onset firing rate responses compared to baseline. Each dot represents mean firing rate for a single trial, with mean  $\pm$  SD across trials indicated to the right. Wilcoxon signed-rank tests (paired): \* $p < 0.05$ , \*\* $p < 0.01$ , \*\*\* $p < 0.001$ , ns  $p > 0.05$ . **(B)** Example unit with suppressed visual onset response. **(C)** Summary of visual onset firing rate responses by unit type and cortical depth. **(a)** Scatter plot depicting visual onset responses for each unit at its estimated fractional depth. Firing rate ratio values above and below 1 (x-axis) indicate excited and suppressed responses, respectively. Outlined markers indicate statistically significant responses ( $p < 0.05$ , Benjamini–Hochberg FDR correction). Marker sizes are scaled by effect size (absolute difference between onset and baseline means, divided by baseline SD). **(b)** Mean effect size (plus 99% confidence interval) across all recorded units (significant and non-significant visual onset responses included) by unit type and depth. Visual onset effect sizes for NS units were significantly stronger than BS units in the deepest cortical depth bin (but see Extended Data Figure 2-1 for spike-equated analysis). One-way ANOVA: \* $p < 0.05$ , \*\* $p < 0.01$ , \*\*\* $p < 0.001$ , ns  $p > 0.05$ . **(c)** Histograms indicating percentages of all recorded units with significant excited and suppressed responses by unit type and depth. Significant visual responses were most concentrated in the deepest cortical depth bin.

## Running head: VISUAL MODULATION OF A1 RECEPTIVE FIELDS

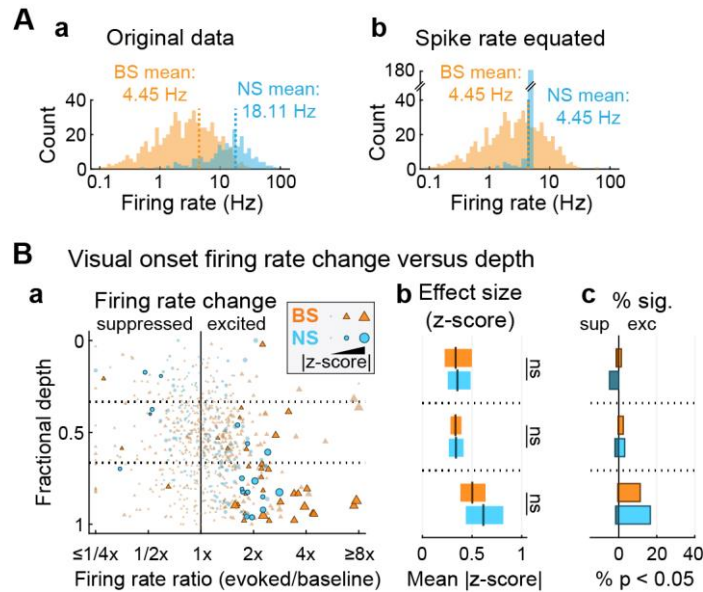

**Extended Data Figure 2-1.** Differences in visual responses between NS and BS units may reflect inherent differences in firing rate. **(A)** Firing rate histograms for each unit type inclusive of both spontaneous and stimulated periods. **(a)** NS units tend to have higher mean firing rates than BS units. **(b)** By subsampling spikes from NS units with firing rates above the mean, a pseudopopulation was created with equivalent mean firing rate to BS units. **(B)** Summary of visual onset firing rate responses by cortical depth for the spike-equated NS and BS unit populations. **(a)** Scatter plot depicting visual onset responses for each unit at its estimated fractional depth. **(b)** Mean effect size (plus 99% confidence interval) across all recorded units (significant and non-significant visual onset responses included) by unit type and depth. No significant differences were observed between BS and spike-equated NS units. One-way ANOVA: ns  $p > 0.05$ . **(c)** Histograms indicating percentages of units with significant excited and suppressed responses by unit type and depth.

475 *Visual-responsive neurons in A1 also typically respond to sound*

476

477 The visual-responsive example unit shown in **Figure 2B** also had an apparent increase in firing  
478 rate aligned to sound onset, whereas the example in **Figure 2A** lacked any discernible change  
479 in firing rate during sound presentation. To quantify the proportions of unimodal and bimodal  
480 visual-responsive units, we examined intersections of significant firing rate changes evoked by  
481 unimodal visual and auditory stimuli. Because numerous prior studies reported differences  
482 between auditory transient spike rate changes at stimulus onset and sustained responses  
483 throughout the remainder of the stimulus, we separately analyzed firing rate responses  
484 averaged within the first 100 ms of the stimulus (onset) and from 200-ms to stimulus end  
485 (sustained). Example visual-responsive neurons with significant auditory onset and sustained  
486 responses are shown in **Figure 3A and B**, respectively. Consistent with previous studies, we  
487 found that onset responses were substantially stronger than sustained responses (**Figure 3C**)  
488 for both unit types (BS units: shallow:  $F = 8.25$ ,  $p = 0.005$ ,  $\eta^2 = 0.053$ ; middle:  $F = 32.68$ ,  $p < 10^{-7}$ ,  
489  $\eta^2 = 0.051$ ; deep:  $F = 5.13$ ,  $p = 0.025$ ,  $\eta^2 = 0.012$ ; NS units: shallow:  $F = 33.15$ ,  $p < 10^{-6}$ ,  $\eta^2 =$   
490  $0.274$ ; middle:  $F = 40.98$ ,  $p < 10^{-8}$ ,  $\eta^2 = 0.170$ ; deep:  $F = 26.17$ ,  $p < 10^{-5}$ ,  $\eta^2 = 0.168$ ). As shown  
491 in **Figure 3D–E**, roughly half of all visual responsive units had either significant onset or  
492 sustained firing rate responses to sound. Considering onset and sustained responses together,  
493 well over two-thirds of visual-responsive neurons exhibited significant sound-evoked firing rate  
494 changes (**Figure 3F**).

## Running head: VISUAL MODULATION OF A1 RECEPTIVE FIELDS

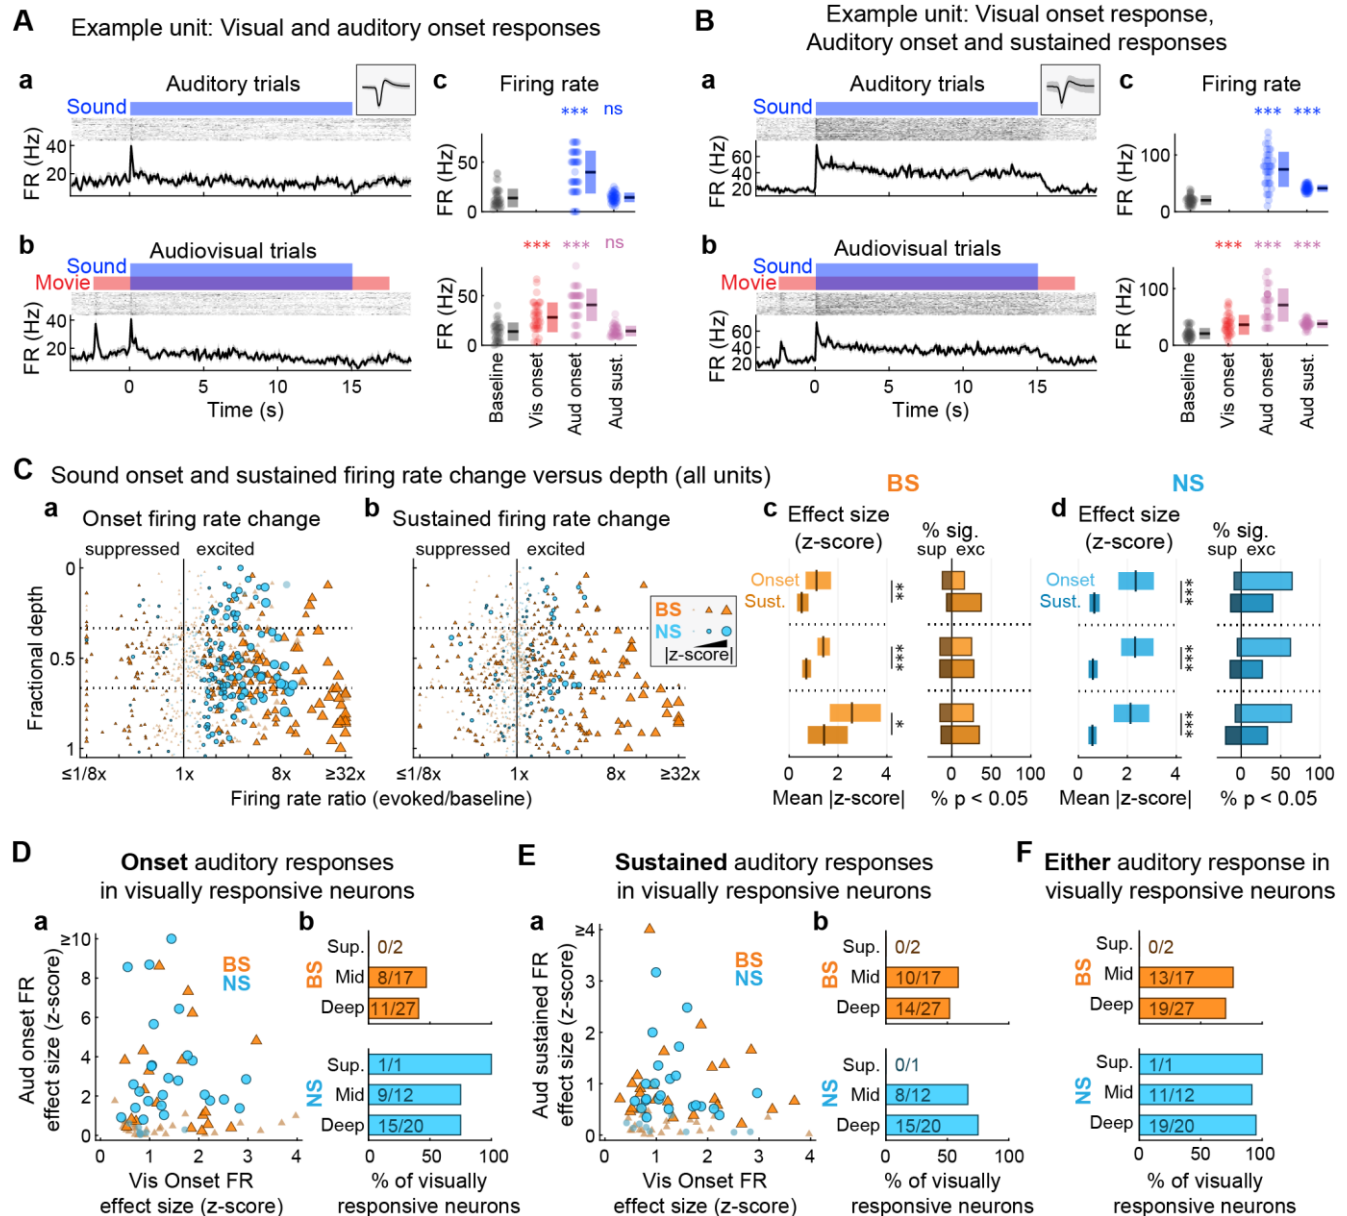

495



## Running head: VISUAL MODULATION OF A1 RECEPTIVE FIELDS

**Figure 3.** Visually responsive neurons in A1 also typically exhibit sound-evoked firing rate responses. **(A)** Example unit with visual and auditory onset evoked firing rate responses. **(a)** Auditory and **(b)** Audiovisual trials. Spiking responses quantified by peristimulus time histograms (lower) and binned-spike count matrices (upper) with red and blue bars indicating auditory and visual stimulus intervals, respectively (temporal binning: 100 ms). Inset in **(a)** shows the unit spike waveform (median  $\pm$  MAD). **(c)** Window-averaged firing rate responses, with dots representing single trials and mean  $\pm$  SD across trials indicated to the right. Wilcoxon signed-rank tests (paired): \* $p < 0.05$ , \*\* $p < 0.01$ , \*\*\* $p < 0.001$ , ns  $p > 0.05$ . **(B)** Example unit with visual onset response as well as both auditory onset and sustained responses, with subplot organization as in **(A)**. **(C)** Sound onset firing rate responses are stronger than sustained responses. **(a, b)** Summary of sound onset and sustained firing rate changes from baseline (including both visual responsive and non-responsive units) separated by unit type and cortical depth. **(c)** Comparison of onset and sustained responses for BS units. Left: mean effect size (plus 99% confidence interval) across all recorded units (significant and non-significant responses included). Effect sizes were significantly greater for onset responses (upper bars, lighter coloring) than sustained responses at each depth bin. One-way ANOVA: \* $p < 0.05$ , \*\* $p < 0.01$ , \*\*\* $p < 0.001$ , ns  $p > 0.05$ . Right: Percentages of all recorded units with significant onset and sustained responses by unit type and depth. **(d)** Comparison of onset and sustained responses for NS units, with subplot organization as in **(c)**. **(D)** Approximately half of visually responsive units have significant sound onset firing rate responses. **(a)** Scatter plot of visual and sound onset response effect sizes. Large markers with outlines reflect units with significant sound onset firing rate responses. **(b)** Bar plot showing the percentages of visually responsive units with significant sound onset firing rate responses. **(E)** Approximately half of visually responsive units have significant sound sustained firing rate responses. Subplot organization as in **(D)**. **(F)** The majority of visually responsive units have significant sound-evoked firing rate responses including either onset or sustained responses. Bars represent the union of sound-responsive units **E, b** and **D, b**. Effect sizes were similarly greater for onset responses across depth bins.

496 In addition to onset and sustained responses, we observed transient firing rate changes  
497 at the offset of RDS segments in only a small minority of units (NS units: 15/212 [7.1%]; BS  
498 units: 27/589 [4.6%]). We thus focused on onset and sustained responses to define sound-  
499 evoked firing rate changes in the current report. Indeed, as in previous studies (Scholl et al.,  
500 2010), we found that the majority of these units also had significant onset and/or sustained  
501 responses (NS units: 12/15 [80.0%]; BS units: 14/27 [51.9%]).

502 The distinction between onset and sustained responses observed in the present study  
503 reinforces the conclusions of numerous previous studies suggesting spike rate changes driven  
504 by different stimulus phases (e.g., onset, offset, sustained) are at least partially dissociable and  
505 may contain different information about sounds (Lu et al., 2001; Wang et al., 2005; Malone et  
506 al., 2015). We pursued a related question as to whether sound-evoked responses reflecting  
507 spike rate and timing changes were similarly partially independent by examining intersections of  
508 sound-evoked firing rate responses (onset and sustained) and STRFs, which are sensitive to  
509 both spike rate and timing changes. As depicted by **Figure 4A, a–c**, STRFs are calculated by  
510 averaging the windowed stimulus segments preceding each spike. Thus, spectrotemporal  
511 tuning depends strictly upon temporal alignment between spike events and stimulus features.  
512 Importantly, such alignment may occur with or without changes from the spontaneous spike  
513 rate. We used a response reliability metric to determine whether observed STRF structure was  
514 statistically different from chance, as defined by STRFs calculated using time-reversed RDS  
515 segments (**Figure 4A, d–e**; Escabí et al., 2014).

516 An example unit with significant STRF reliability, which also had clear firing rate changes  
517 from baseline, is shown in **Figure 4B**. By contrast, **Figure 4C** shows an example unit with  
518 significant STRF reliability but neither significant onset nor sustained firing rate changes.  
519 Significantly reliable STRFs were observed in the majority of both NS and BS units (**Figure 4D**).  
520 Notably, significant changes in firing rate were not observed in many of the units with significant

Running head: VISUAL MODULATION OF A1 RECEPTIVE FIELDS

521 STRFs (**Figure 4E**). For BS units, significant STRFs without onset responses were slightly more  
522 common than both STRF and onset responses together, whereas the reverse was true for NS  
523 units (**Figure 4E, a**). For both unit types, sustained responses were observed in roughly half of  
524 units with significant STRFs (**Figure 4E, b**). Significant firing rate changes (onset or sustained)  
525 without STRFs were rare. Because sustained responses and STRFs were calculated from the  
526 same analysis windows, spikes, and stimulus distributions, our results underscore the important  
527 distinction between changes in spike rate and timing in response to sound.

528 We quantified how many visual-responsive neurons were also responsive to sound  
529 features as revealed by STRF calculation, e.g., as shown by the visual-responsive example unit  
530 with significant spectrotemporal tuning in **Figure 5A**. Group data indicated that visual-  
531 responsive neurons with significant STRFs were the rule rather than the exception, with  
532 significant STRFs observed in all but a handful of BS units (**Figure 5B**). Extending the definition  
533 of 'sound responsive' to include STRFs as well as onset or sustained firing rate responses  
534 indicated that, with just a few exceptions, visual-responsive neurons in A1 also respond to  
535 sound (**Figure 5C**).

## Running head: VISUAL MODULATION OF A1 RECEPTIVE FIELDS

### A Spectrotemporal receptive field estimation

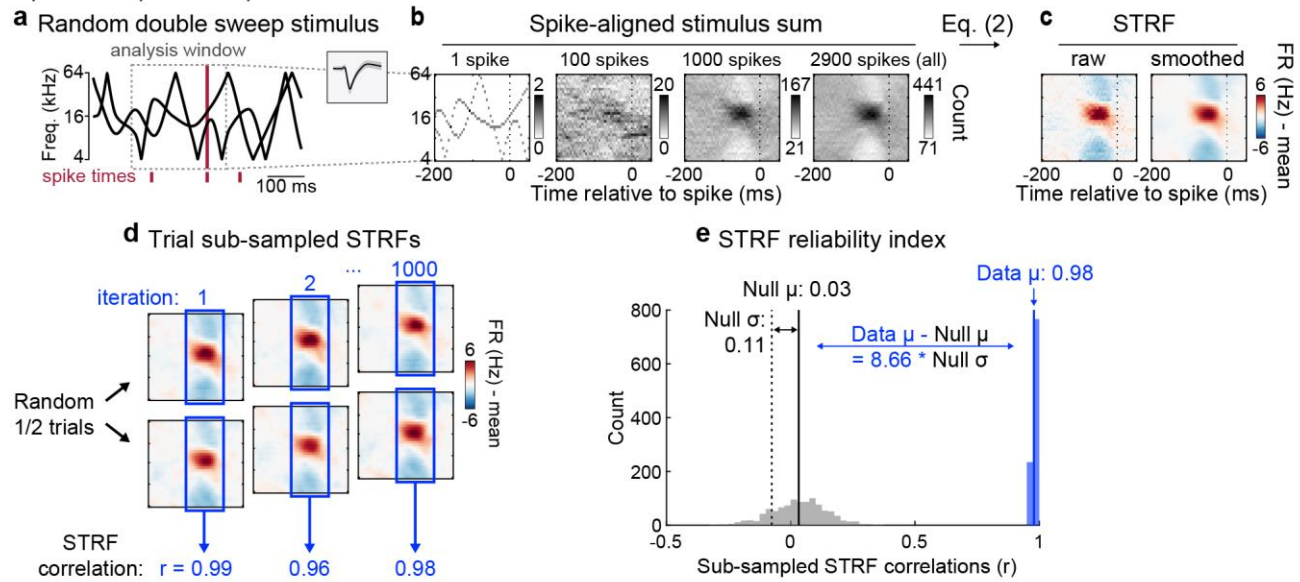

### B Example unit: STRF with sustained firing rate change

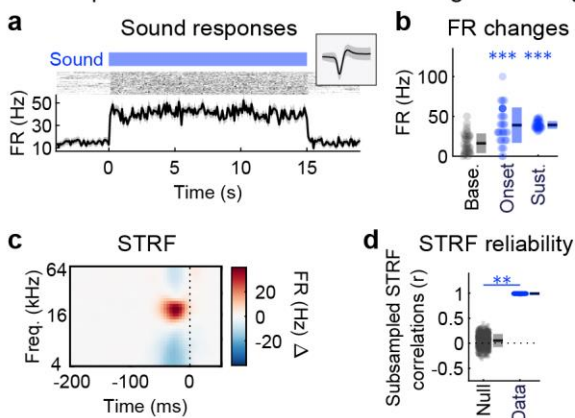

### C Example unit: STRF without sustained firing rate change

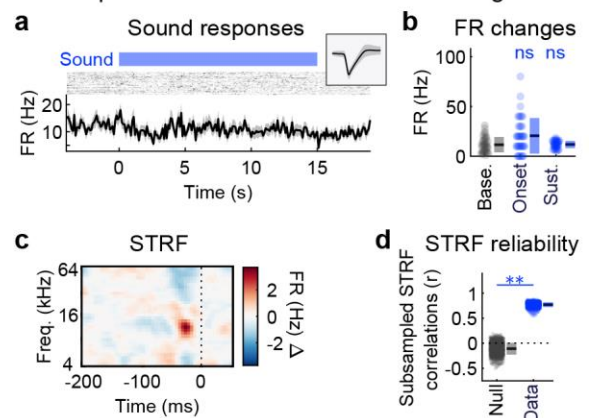

### D STRF reliability versus depth (all units)

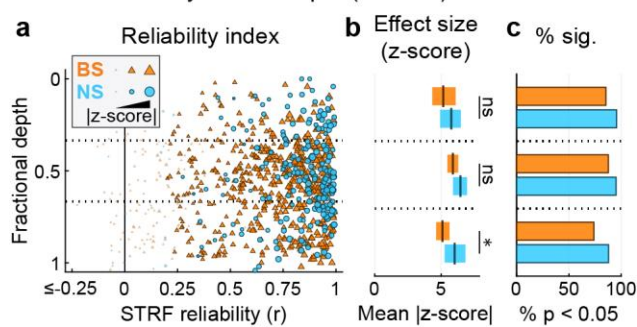

### E Overlap between significant STRFs and FR responses

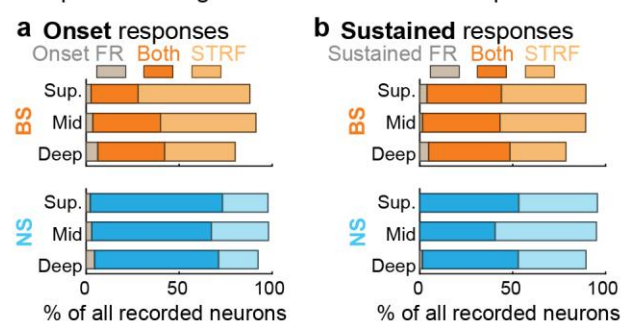

## Running head: VISUAL MODULATION OF A1 RECEPTIVE FIELDS

**Figure 4.** Auditory cortical neurons may encode spectrotemporal features with or without significant spike rate changes. **(A)** Spectrotemporal receptive field (STRF) estimation procedure. **(a)** For each spike, a segment of the RDS stimulus was stored using a window 200 ms before and 50 ms after the spike time. **(b)** RDS segments aligned to each spike were added to a cumulative sum. Structure in the time-frequency bins typically only emerges after several hundred spikes or more. **(c)** Transforming the spike-aligned stimulus sum according to Eq. (2) yielded an STRF estimate expressed in firing rate (Hz) deviations from the mean driven rate. Red and blue regions indicate stimulus energy at time-frequency bins associated with increases and decreases in firing rate, respectively. **(d)** A subsampling procedure was used to determine the statistical significance of time-frequency bin structure in the STRFs. The correlation coefficient between STRFs calculated from random trial halves (without replacement) was calculated across 1000 iterations. **(e)** The STRF reliability index was defined as the mean of the subsampled correlation coefficient distribution. A null distribution was obtained from STRFs calculated using time-reversed stimulus RDS segments, which breaks the temporal relationship between spikes and stimulus features but preserves spike count and timing statistics. A p-value was obtained by dividing the number of null STRF correlations exceeding the reliability index (data) by the number of iterations and multiplying by two for two-tailed significance. Effect size reflected the absolute difference between null and data means, divided by the null standard deviation. **(B)** Example unit with significant STRF reliability as well as onset and sustained firing rate responses. **(a)** Spiking responses quantified by peristimulus time histograms (lower) and binned-spike count matrices (upper) with blue bar indicating auditory stimulus interval (temporal binning: 100ms). Inset shows the unit spike waveform (median  $\pm$  MAD). **(b)** Summary of sound onset and sustained firing rate responses compared to baseline. Each dot represents a single trial, with mean  $\pm$  SD across trials indicated to the right. Wilcoxon signed-rank tests (paired): \* $p < 0.05$ , \*\* $p < 0.01$ , \*\*\* $p < 0.001$ , ns  $p > 0.05$ . **(c)** STRF as calculated in (A, a–c). **(d)** STRF reliability as calculated in (A, d–e). Each dot represents the correlation between STRFs for a single subsample iteration, with mean  $\pm$  SD across trials indicated to the right. Subsampling test: \* $p < 0.05$ , \*\* $p < 0.01$ , \*\*\* $p < 0.001$ , ns  $p > 0.05$ . **(C)** Example unit significant STRF reliability but non-significant onset and sustained firing rate responses. Subplot organization as in (B). **(D)** Summary of STRF reliability by unit type and cortical depth. **(a)** STRF reliability for each unit at its estimated cortical depth. Marker sizes are scaled by effect size, with outlined markers indicating units with significant STRF reliability ( $p < 0.05$ , Benjamini–Hochberg FDR correction). **(b)** Mean effect size (plus 99% confidence interval) across all recorded units (units with significant and non-significant reliability included) by unit type and depth. A small difference between unit types was observed in the deepest cortical bin. One-way ANOVA: \* $p < 0.05$ , \*\* $p < 0.01$ , \*\*\* $p < 0.001$ , ns  $p > 0.05$ . **(c)** Histograms indicating percentages of all recorded units with significant STRF reliability. **(E)** Significant STRF reliability may occur with or without significant firing rate changes. **(a)** Intersections of significant onset firing rate responses alone, significant STRF reliability alone, or both. **(b)** Intersections of significant sustained firing rate responses alone, significant STRF reliability alone, or both.

## Running head: VISUAL MODULATION OF A1 RECEPTIVE FIELDS

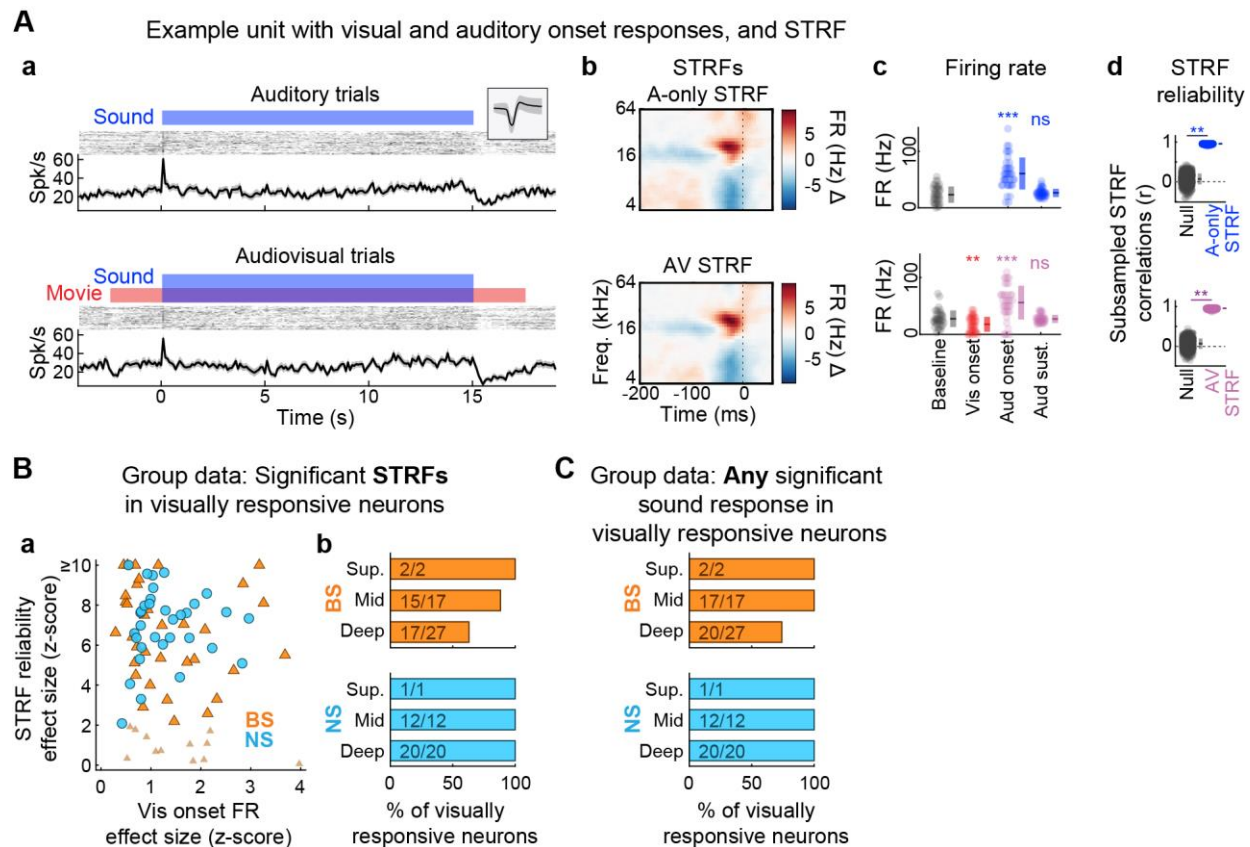

**Figure 5.** Visually responsive A1 neurons are typically tuned for spectrotemporal features. **(A)** Example unit with both visual and auditory onset firing rate responses as well as significant STRF reliability. **(a)** Spiking responses quantified by peristimulus time histograms (lower) and binned-spike count matrices (upper) with blue and red bars indicating auditory and visual stimulus intervals, respectively (temporal binning: 100ms). Inset shows the unit spike waveform (median  $\pm$  MAD). **(b)** STRFs for each condition. **(c)** Summary of firing rate responses compared to baseline. Each dot represents a single trial, with mean  $\pm$  SD across trials indicated to the right. Wilcoxon signed-rank tests (paired): \* $p < 0.05$ , \*\* $p < 0.01$ , \*\*\* $p < 0.001$ , ns  $p > 0.05$ . **(d)** STRF reliability for each condition. Each dot represents the correlation between STRFs for a single subsample iteration, with mean  $\pm$  SD across trials indicated to the right. Subsampling test: \* $p < 0.05$ , \*\* $p < 0.01$ , \*\*\* $p < 0.001$ , ns  $p > 0.05$ . **(B)** The majority of visually responsive units have significant STRF reliability. **(a)** Scatter plot showing effect size for visual onset and STRF reliability. The larger, outlined markers indicate units with significant STRF reliability. **(b)** Bar plots showing percentages of visually responsive units with significant STRF reliability. **(C)** The majority of visually responsive units also respond to sound as defined by either significant firing rate responses (onset or sustained) or STRF reliability. Bars represent the union of units with significant STRF reliability and units with significant firing rate responses (onset or sustained).

Running head: VISUAL MODULATION OF A1 RECEPTIVE FIELDS

539 The preceding results indicated that if a neuron was responsive to visual stimuli, it was  
 540 likely also responsive to sound. We addressed a corollary question of whether the presence or  
 541 absence of an auditory response predicted whether a unit was responsive to visual stimuli. Chi-  
 542 squared tests were used to compare percentages of visual-responsive units within unit  
 543 subpopulations separated by significant and non-significant auditory responses. As depicted in  
 544 **Figure 6**, visual responsiveness was not strongly predicted by the presence or absence of any  
 545 auditory response type for either unit subpopulation. Small but statistically significant effects  
 546 were observed for NS units in the deepest bin for sustained spike rate changes (**Figure 6B**;  $X^2$   
 547 = 4.63,  $p = 0.031$ ) and STRFs (**Figure 6C**;  $X^2 = 4.28$ ,  $p = 0.039$ ). A similar trend was observed  
 548 for sustained responses in the middle depth bin (**Figure 6B**;  $X^2 = 3.84$ ,  $p = 0.050$ ). These results  
 549 suggested that the absence of either sound response was associated with decreased probability  
 550 of a visual response, recapitulating analyses above suggesting responses to the two modalities  
 551 tended to occur together. Differences for all other depth bins, and across depth bins for BS units  
 552 were non-significant (all  $X^2 < 1.90$ , all  $p$ -values  $> 0.16$ ). Thus, with minor exceptions, visual  
 553 responses were approximately evenly distributed among sound response types, leaving cortical  
 554 depth as the most meaningful predictor of visual responsiveness.

555

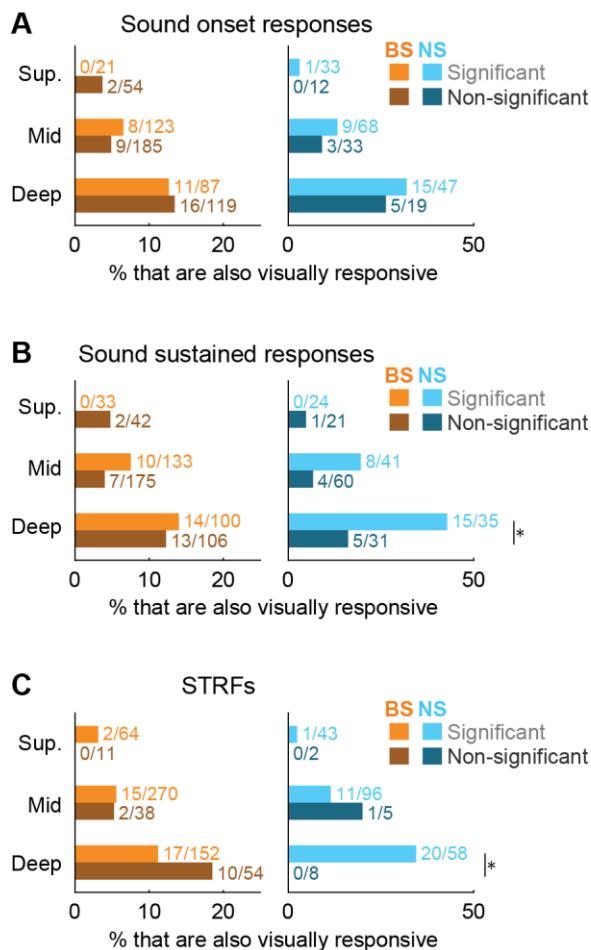

**Figure 6.** Sound response archetypes are not strongly predictive of visual responsiveness. Each subplot shows the proportion of BS and NS units (left and right) separated by cortical depth with and without significant sound responses (light and dark bars) as defined by (A) onset firing rate responses, (B) sustained firing rate responses, and (C) STRFs. NS units in the deepest cortical bin with significant sustained sound responses and STRFs were more likely to have significant visual responses (Chi-square tests: \* $p < 0.05$ ). The presence or absence of any other sound response at any other depth bin did not predict visual responsiveness.

556 *Visual context differentially modulates sound onset and sustained firing rate responses*

557

## Running head: VISUAL MODULATION OF A1 RECEPTIVE FIELDS

558 The foregoing results documented unimodal visual responses in a subpopulation of A1 neurons,  
559 and further that most of these units were bimodal, responding to both visual and auditory stimuli.  
560 We investigated further the extent of audiovisual integration in A1 by examining the frequency  
561 with which sound onset and sustained firing rate responses were themselves modulated by the  
562 presence or absence of the visual stimulus. **Figure 7A** shows an example neuron for which both  
563 sound onset and sustained responses significantly increased on audiovisual trials. For the  
564 example unit in **Figure 7B**, the sustained response decreased significantly on audiovisual trials,  
565 but the onset was unaffected. The latter outcome was typical of units with visual-modulated  
566 responses to sound. Indeed, the example neuron in **Figure 7A** was the only unit in the entire  
567 population for which sound onset response changed significantly with visual stimulation (**Figure**  
568 **7C, a**). By comparison, sustained sound firing rate responses were significantly modulated by  
569 visual context in 7.1% of NS units and 5.1% of BS units (**Figure 7C, b**). ANOVA confirmed  
570 visual modulation effect sizes were larger for sustained than onset responses for the middle and  
571 deep cortical depth bins for both unit types (BS units: shallow:  $F = 0.16$ ,  $p = 0.687$ ,  $\eta^2 = 0.001$ ;  
572 middle:  $F = 8.62$ ,  $p = 0.003$ ,  $\eta^2 = 0.014$ ; deep:  $F = 9.79$ ,  $p = 0.002$ ,  $\eta^2 = 0.024$ ; NS units: shallow:  
573  $F = 0.10$ ,  $p = 0.756$ ,  $\eta^2 = 0.001$ ; middle:  $F = 6.60$ ,  $p = 0.011$ ,  $\eta^2 = 0.032$ ; deep:  $F = 9.46$ ,  $p =$   
574  $0.003$ ,  $\eta^2 = 0.068$ ). Notably, these outcomes were exactly opposite of responses driven by  
575 sound alone, in which case onsets were substantially stronger than sustained firing rate  
576 changes (**Figure 3**).

577 Consistent with the concentration of unimodal visual responses in the deepest cortical  
578 bin (**Figure 2**), the majority of units with visual-modulated sustained responses to sound were  
579 observed in either the middle or deep cortical bin, with the strongest mean effect size in the  
580 deepest bin (**Figure 7C, c–d**). ANOVA confirmed small but significant effects of cortical depth  
581 on visual modulated sustained sound responses for both unit types (BS units:  $F = 3.22$ ,  $p =$   
582  $0.041$ ,  $\eta^2 = 0.011$ ; NS units:  $F = 4.69$ ,  $p = 0.010$ ,  $\eta^2 = 0.043$ ). Visual modulated onset responses  
583 were not significantly dependent upon depth (BS units:  $F = 2.35$ ,  $p = 0.096$ ,  $\eta^2 = 0.008$ ; NS  
584 units:  $F = 0.25$ ,  $p = 0.780$ ,  $\eta^2 = 0.002$ ). All differences between unit type were similarly non-  
585 significant (all  $F$ -ratios  $< 1.5$ ,  $p$ -values  $> 0.23$ ), with the exception of borderline effect suggesting  
586 stronger sustained response modulation for BS units in the shallowest bin ( $F = 3.91$ ,  $p = 0.051$ ,  
587  $\eta^2 = 0.032$ ).

588 Sound-evoked sustained firing rates were suppressed below baseline for the example  
589 units in **Figure 7A–B**. However, the effect of visual stimulation was opposite for each neuron,  
590 elevating firing near the spontaneous rate for the example in **Figure 7A** and further decreasing  
591 the suppressed response for the example in **Figure 7B**. These examples raised the possibility  
592 that effects of visual stimulation on sound-evoked firing rate responses might differ depending  
593 on whether responses to sound alone reflected an increase or decrease in spike rate relative to  
594 baseline (spontaneous). We thus expanded the analyses above by dividing onset and sustained  
595 responses into subgroups for which the sound-evoked response was greater or less than  
596 spontaneous. Distributions of sound-evoked firing rate responses divided by baseline rates are  
597 shown in **Extended Data Figure 7-1A–B**, indicating both increases and decreases in firing rate  
598 relative to baseline were common for both onset and sustained responses in both unit  
599 subpopulations. Designations of ‘excited’ and ‘suppressed’

## Running head: VISUAL MODULATION OF A1 RECEPTIVE FIELDS

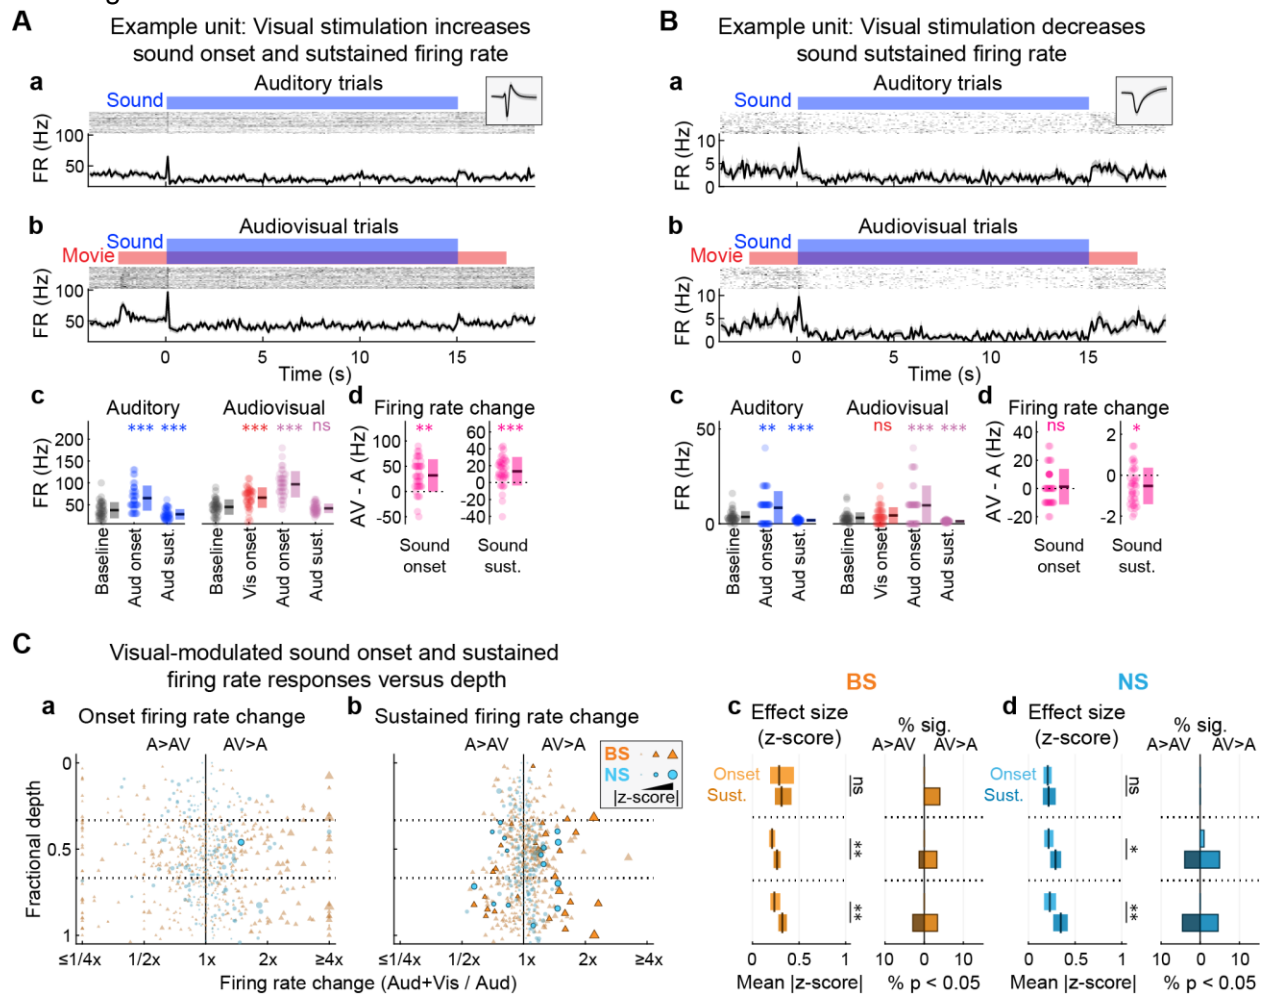

**Figure 7.** Visual context differentially modulates sound onset and sustained firing rate responses. **(A)** Example unit for which visual stimulation significantly increased onset and sustained firing rate responses to sound. **(a)** Auditory and **(b)** Audiovisual trials. Spiking responses quantified by peristimulus time histograms (lower) and binned-spike count matrices (upper) with red and blue bars indicating auditory and visual stimulus intervals, respectively (temporal binning: 100 ms). Inset in **(a)** shows the unit spike waveform (median  $\pm$  MAD). **(c)** Window-averaged firing rate responses, with dots representing single trials and mean  $\pm$  SD across trials indicated to the right. Wilcoxon signed-rank tests (paired): \* $p < 0.05$ , \*\* $p < 0.01$ , \*\*\* $p < 0.001$ , ns  $p > 0.05$ . **(d)** Difference in averaged firing rate responses between conditions (Audiovisual - Auditory trials), with dots representing single trials and mean  $\pm$  SD across trials indicated to the right. Wilcoxon signed-rank tests (paired): \* $p < 0.05$ , \*\* $p < 0.01$ , \*\*\* $p < 0.001$ , ns  $p > 0.05$ . **(B)** Example unit for which visual stimulation significantly increased sustained but not onset firing rate responses to sound. Subplot organization as in **(A)**. **(C)** Visual modulation effects are stronger for sound sustained firing rate responses than onset responses. **(a, b)** Summary of visual-modulated sound onset and sustained firing rate changes (Audiovisual divided by Auditory) separated by unit type and cortical depth for all units. Scatter plots depict firing rate changes between conditions for each unit by cortical depth. Firing rate ratio values above and below 1 (x-axis) indicate increases and decreases in firing on Audiovisual trials relative to Auditory trials, respectively. Outlined markers indicate statistically significant responses. Marker sizes are scaled by effect size (absolute difference between Audiovisual and Auditory means, divided by Auditory SD). **(c)** Comparison of visual-modulated onset and sustained responses for BS units. Left: mean effect size (plus 99% confidence interval) across all recorded units (significant and non-significant responses included). Effect sizes were significantly greater for sustained responses (lower bars, darker coloring) than onset responses at the middle and deep bins. One-way ANOVA: \* $p < 0.05$ , \*\* $p < 0.01$ , \*\*\* $p < 0.001$ , ns  $p > 0.05$ . Right: Percentages of all recorded units with significant visual-modulated onset and sustained responses. **(d)** Comparison of onset and sustained responses for NS units, with subplot organization as in **(c)**. Effect sizes were similarly greater for sustained responses (lower bars, darker coloring) at the middle and deep bins. See Extended Data Figure 7-1 for results separated by units for which sound responses reflected increases and decreases from baseline.



## Running head: VISUAL MODULATION OF A1 RECEPTIVE FIELDS

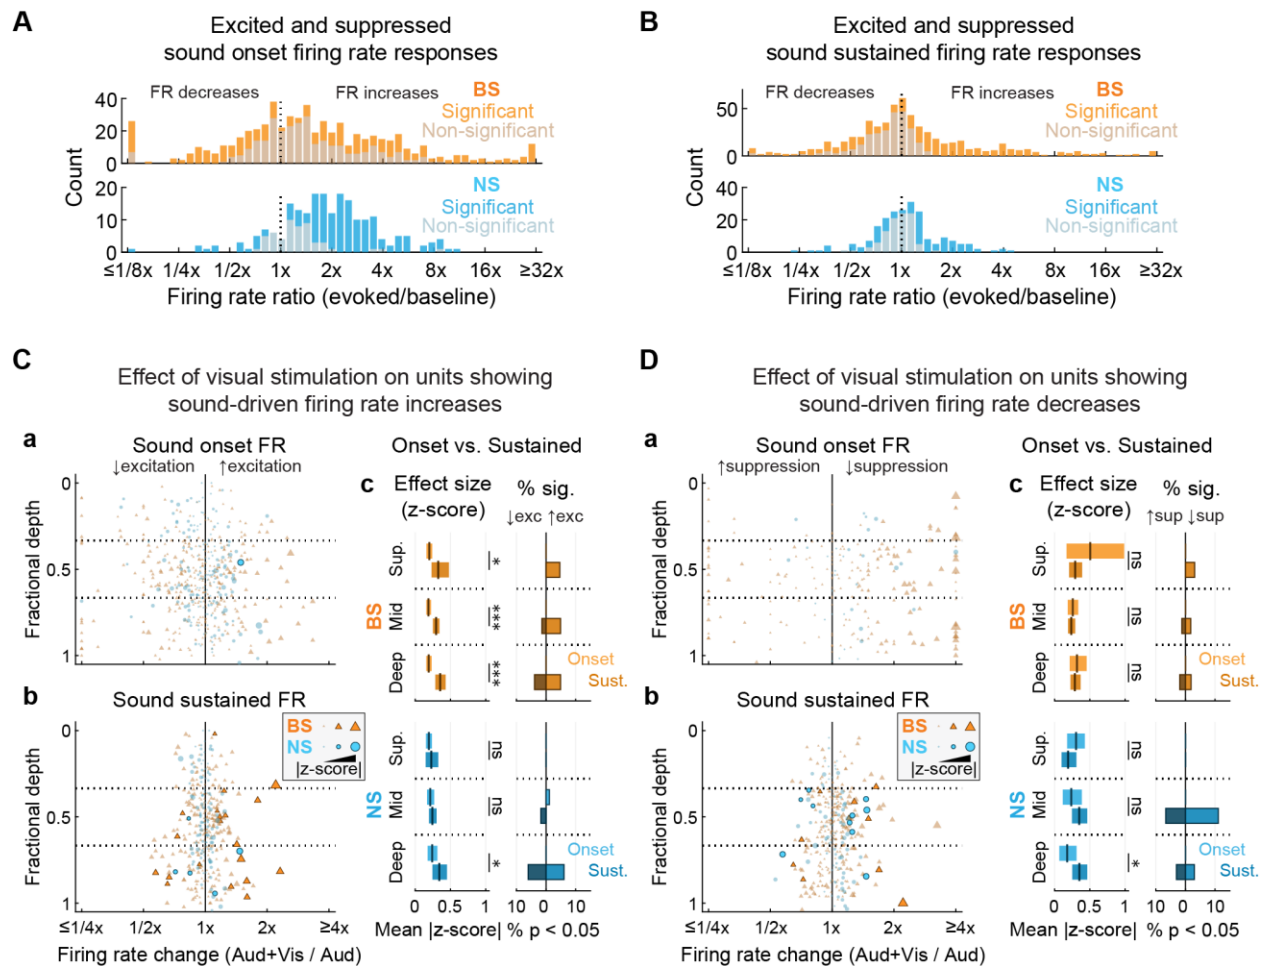

**Extended Data Figure 7-1.** Visual modulation of excited and suppressed sound onset and sustained firing rate responses. **(A)** Sound may evoke increases or decreases in onset firing rate. Histograms show the numbers of units (BS, top; NS, bottom) with increases and decreases in firing rate relative to baseline, with significant ( $p < 0.05$ ) and non-significant ( $p \geq 0.05$ ) responses indicated by dark and light bars, respectively. **(B)** Sound may evoke increases or decreases in sustained firing rate. Histograms as in (A). **(C)** Summary of visual stimulation effects on onset and sustained firing rate responses that were excited relative to baseline. **(a, b)** Summary of visual-modulated sound onset and sustained firing rate changes (Audiovisual divided by Auditory) separated by unit type and cortical depth for all units with excited responses. Scatter plots depict firing rate changes between conditions for each unit by cortical depth. Firing rate ratio values above and below 1 (x-axis) indicate increases and decreases in excitation on Audiovisual trials relative to Auditory trials, respectively. Outlined markers indicate statistically significant responses. Marker sizes are scaled by effect size (absolute difference between Audiovisual and Auditory means, divided by Auditory SD). **(c)** Comparison of visual-modulated onset and sustained responses for BS (top) and NS units (bottom). Left: mean effect size (plus 99% confidence interval) across units with excited sound responses. Visual modulation effect sizes were significantly greater for sustained responses (lower bars, darker coloring) than onset responses across depth bins for BS units, and at the deepest bin for NS units. One-way ANOVA: \* $p < 0.05$ , \*\* $p < 0.01$ , \*\*\* $p < 0.001$ , ns  $p > 0.05$ . Right: Percentages of all recorded units with significant visual-modulated onset and sustained responses. **(D)** Summary of visual stimulation effects on onset and sustained firing rate responses that were suppressed relative to baseline. Subplot organization as in (C).

## Running head: VISUAL MODULATION OF A1 RECEPTIVE FIELDS

602 units were inclusive of both significant and non-significant increases and decreases in  
603 firing rate, respectively, to accommodate potential cases in which sound-evoked responses only  
604 reached significance in one or the other condition (e.g., sustained response in **Figure 7A**). By  
605 separating visual-modulatory influences into excited and suppressed subgroups, the analysis  
606 included four possible forms of modulation: increases and decreases in excited and suppressed  
607 responses.

608 Outcomes of this analysis were generally consistent with the pooled results reported  
609 above. For BS units with excited responses (**Extended Data Figure 7-1C, c**), visual modulation  
610 effects were stronger for sustained than onset responses at all depth bins (shallow:  $F = 5.99$ ,  $p$   
611  $= 0.016$ ,  $\eta^2 = 0.062$ ; middle:  $F = 27.20$ ,  $p < 10^{-6}$ ,  $\eta^2 = 0.074$ ; deep:  $F = 29.82$ ,  $p < 10^{-6}$ ,  $\eta^2 =$   
612  $0.115$ ). For BS units with suppressed responses (**Extended Data Figure 7-1D, c**), differences  
613 in visual modulation between sustained and onset responses were non-significant at all depth  
614 bins (all  $F$ -ratios  $< 2.15$ ,  $p$ -values  $> 0.14$ ). These non-significant outcomes may reflect floor  
615 effects limiting suppression of the already relatively low spontaneous rates in BS units. For NS  
616 units with both excited and suppressed responses, visual modulation effects were stronger for  
617 sustained than onset responses at the deepest bin only (excited:  $F = 4.59$ ,  $p = 0.035$ ,  $\eta^2 =$   
618  $0.051$ ; suppressed:  $F = 4.79$ ,  $p = 0.034$ ,  $\eta^2 = 0.100$ ; all other  $F$ -ratios  $< 2.0$ ,  $p$ -values  $> 0.16$ ).

619 For the example neuron in **Figure 7A**, but not the example in **Figure 7B**, visual  
620 modulated responses to sound coincided with a significant response to visual stimulation alone.  
621 We examined the consistency of these outcomes by calculating intersections between unimodal  
622 visual responses and visual-modulated sustained responses to sound. **Figure 8A** shows an  
623 example unit for which a sustained, excitatory response to sound was further elevated by visual  
624 stimulation even though the response to visual stimulation alone was not significant. This was  
625 true for the majority of units with visual-modulated sustained sound responses, as seen in  
626 **Figure 8B**, which did not respond outright to unimodal visual stimuli. This finding suggests only  
627 partial overlap between visual responsive and visual modulated unit subpopulations.

628  
629 *Visual stimulation may modify STRFs independently of firing rate changes*

630  
631 As reported above, many units for which sound-evoked firing rate responses were significantly  
632 modulated by visual stimulation were not significantly responsive to visual stimulation alone.  
633 This suggested that STRFs might likely also be modulated by the presence of visual stimuli,  
634 possibly for units without responses to unimodal visual stimuli. We therefore examined visual  
635 influences on spectrotemporal encoding by calculating difference STRFs, referred to hereafter  
636 as  $\Delta$ STRFs, reflecting the STRF in the auditory condition subtracted from the STRF in the  
637 audiovisual condition. The significance of  $\Delta$ STRFs was determined by iteratively subsampling  
638 STRFs from each condition and calculating the difference, then comparing the  $\Delta$ STRF  
639 correlation distribution to an equivalent null distribution (**Figure 9A, a–b**). An example neuron  
640 with significant  $\Delta$ STRF reliability is shown in **Figure 9B**. In total, 7.1% of NS units and 6.3% of  
641 BS units had STRFs that were significantly modulated by visual stimulation (**Figure 9C**). There  
642 was no evidence that  $\Delta$ STRF reliability depended significantly on cortical depth or unit type (all  
643  $F$ -ratios  $< 2.6$ , all  $p$ -values  $> 0.11$ ). As with sustained firing rate responses to sound, visual  
644 modulation of STRFs most often occurred without significant responses to visual stimulation  
645 alone (**Figure 9D**).

Running head: VISUAL MODULATION OF A1 RECEPTIVE FIELDS

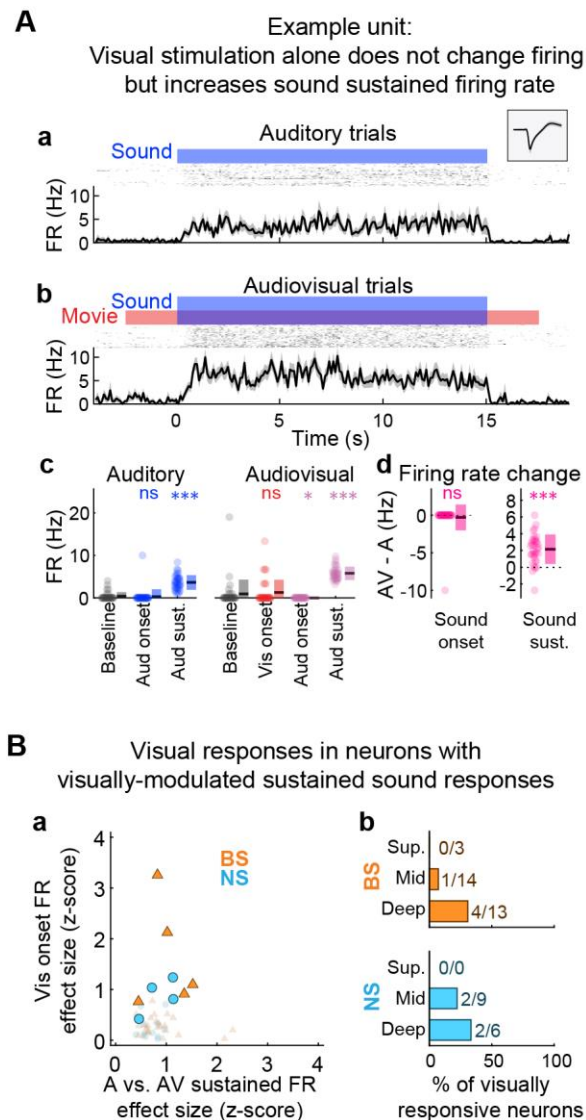

**Figure 8.** Sound-evoked firing rate responses may be modulated by visual inputs even without responses to visual stimulation alone. **(A)** Example unit with non-significant visual onset response but significant visual-modulated increases in sustained firing rate responses to sound. **(a)** Auditory and **(b)** Audiovisual trials. Spiking responses quantified by peristimulus time histograms (lower) and binned-spike count matrices (upper) with red and blue bars indicating auditory and visual stimulus intervals, respectively (temporal binning: 100 ms). Inset in **(a)** shows the unit spike waveform (median  $\pm$  MAD). **(c)** Window-averaged firing rate responses, with dots representing single trials and mean  $\pm$  SD across trials indicated to the right. Wilcoxon signed-rank tests (paired): \* $p < 0.05$ , \*\* $p < 0.01$ , \*\*\* $p < 0.001$ , ns  $p > 0.05$ . **(d)** Difference in averaged firing rate responses between conditions (Audiovisual - Auditory trials), with dots representing single trials and mean  $\pm$  SD across trials indicated to the right. Wilcoxon signed-rank tests (paired): \* $p < 0.05$ , \*\* $p < 0.01$ , \*\*\* $p < 0.001$ , ns  $p > 0.05$ . **(B)** Many units with significant visual-modulated sustained sound firing rate responses are not responsive to visual stimulation alone. **(a)** Scatter plot of effect sizes for visual onset responses and visual-modulated sustained sound responses. Large markers with outlines reflect units with significant visual onset firing rate responses. **(b)** Bar plot showing the percentages of units with significant visual-modulated sustained sound responses that are also visual responsive.

646 Two outcomes reported above further raised the possibility that STRFs may be  
 647 modulated by visual stimulation independently of firing rate changes. First, significant STRFs  
 648 were frequently obtained on auditory trials even in the absence of time-averaged firing rate  
 649 changes (**Figure 4**). Second, sound-evoked firing rate changes (onset vs. sustained) were  
 650 themselves independently modulated by visual context (**Figure 7**). To address this possibility,  
 651 we examined overlap between units with significant  $\Delta$ STRF reliability and visual-modulated  
 652 sustained firing rate responses. For the example unit in **Figure 10A**, the STRF was significantly  
 653 modulated by visual context, even though the sustained firing rate response did not significantly  
 654 change from baseline, let alone between conditions. Group data presented in **Figure 10B**  
 655 revealed that similar independent modulation of sustained firing rate responses and STRFs  
 656 occurred in the majority of units sensitive to visual context.  
 657  
 658

## Running head: VISUAL MODULATION OF A1 RECEPTIVE FIELDS

### A Difference STRF ( $\Delta$ STRF) estimation

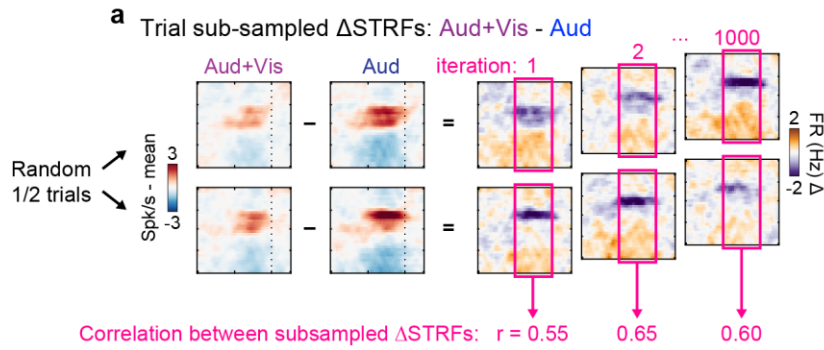

### b $\Delta$ STRF reliability index

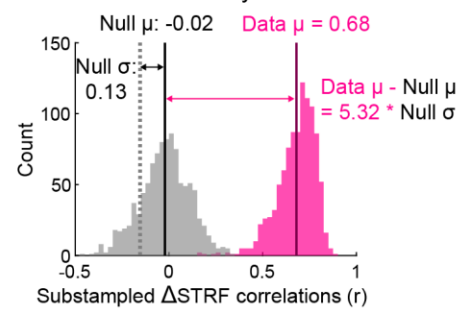

### B Example unit with visually modulated STRF

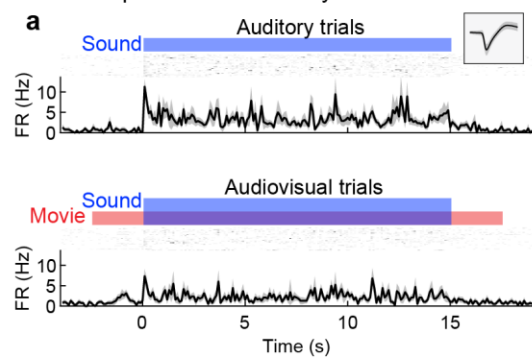

### d STRF reliability

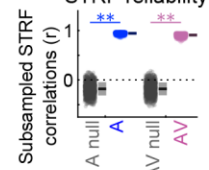

### e $\Delta$ STRF reliability

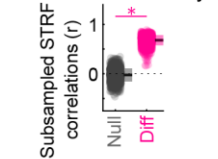

### C $\Delta$ STRF reliability versus depth (all units)

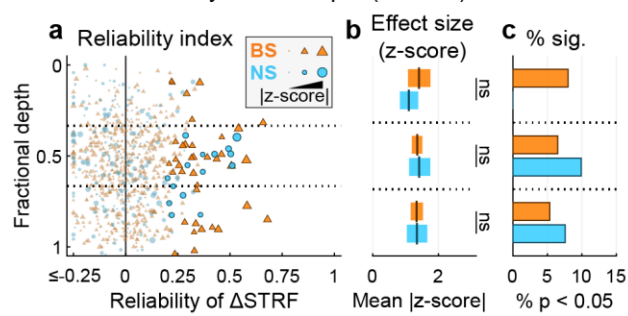

### D Firing rate responses to visual stimulation in units with visually modulated STRFs

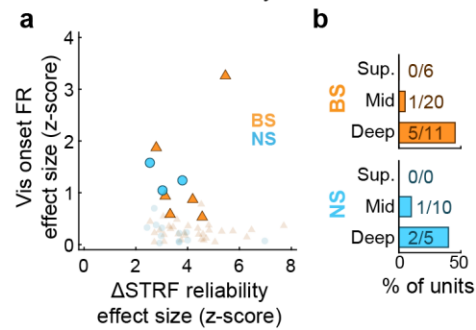

659

## Running head: VISUAL MODULATION OF A1 RECEPTIVE FIELDS

**Figure 9.** Visual context may modify spectrotemporal receptive fields even in units without significant responses to visual stimulation alone. **(A)** Procedure for estimating differences in STRFs between conditions ( $\Delta$ STRFs). **(a)**  $\Delta$ STRFs were estimated by subtracting the Audiovisual STRF from the Auditory alone STRF. A subsampling test was used to determine the statistical significance of time-frequency bin structure in the  $\Delta$ STRFs. The correlation coefficient between  $\Delta$ STRFs calculated from random trial halves (without replacement) was calculated across 1000 iterations. **(b)**  $\Delta$ STRF reliability was defined as the mean of the subsampled correlation coefficient distribution. A null  $\Delta$ STRF distribution was obtained from  $\Delta$ STRFs calculated using time-reversed stimulus RDS segments. A p-value was obtained by dividing the number of null STRF correlations exceeding the reliability index (data) by the number of iterations and multiplying by two for two-tailed significance. Effect size reflected the absolute difference between null and data means, divided by the null standard deviation. **(B)** Example unit with significant  $\Delta$ STRF reliability. **(a)** Spiking responses quantified by peristimulus time histograms (lower) and binned-spike count matrices (upper) with blue and red bars indicating auditory and visual stimulus intervals, respectively (temporal binning: 100ms). Inset shows the unit spike waveform (median  $\pm$  MAD). **(b)** STRFs for each condition **(c)**  $\Delta$ STRF **(d)** STRF reliability for each condition. **(e)**  $\Delta$ STRF reliability. For (d) and (e), each dot represents the correlation between STRFs or  $\Delta$ STRFs for a single subsample iteration, with mean  $\pm$  SD across trials indicated to the right. Subsampling test: \* $p < 0.05$ , \*\* $p < 0.01$ , \*\*\* $p < 0.001$ , ns  $p > 0.05$ . **(C)** Summary of  $\Delta$ STRF reliability by unit type and cortical depth. **(a)**  $\Delta$ STRF reliability for each unit at its estimated cortical depth. Marker sizes are scaled by effect size, with outlined markers indicating units with significant  $\Delta$ STRF reliability ( $p < 0.05$ , Benjamini–Hochberg FDR correction). **(b)** Mean effect size (plus 99% confidence interval) across all recorded units (units with significant and non-significant reliability included) by unit type and depth. No differences between unit types were observed. One-way ANOVA: ns  $p > 0.05$ . **(c)** Histograms indicating percentages of all recorded units with significant  $\Delta$ STRF reliability. **(D)** Significant  $\Delta$ STRF reliability often occurs without significant visual onset firing rate changes. **(a)** Scatter plot of visual onset and  $\Delta$ STRF reliability response effect sizes. Large markers with outlines reflect units with significant visual onset firing rate responses. **(b)** Bar plot showing the percentages of units with significant  $\Delta$ STRF reliability that are also visually responsive.

Running head: VISUAL MODULATION OF A1 RECEPTIVE FIELDS

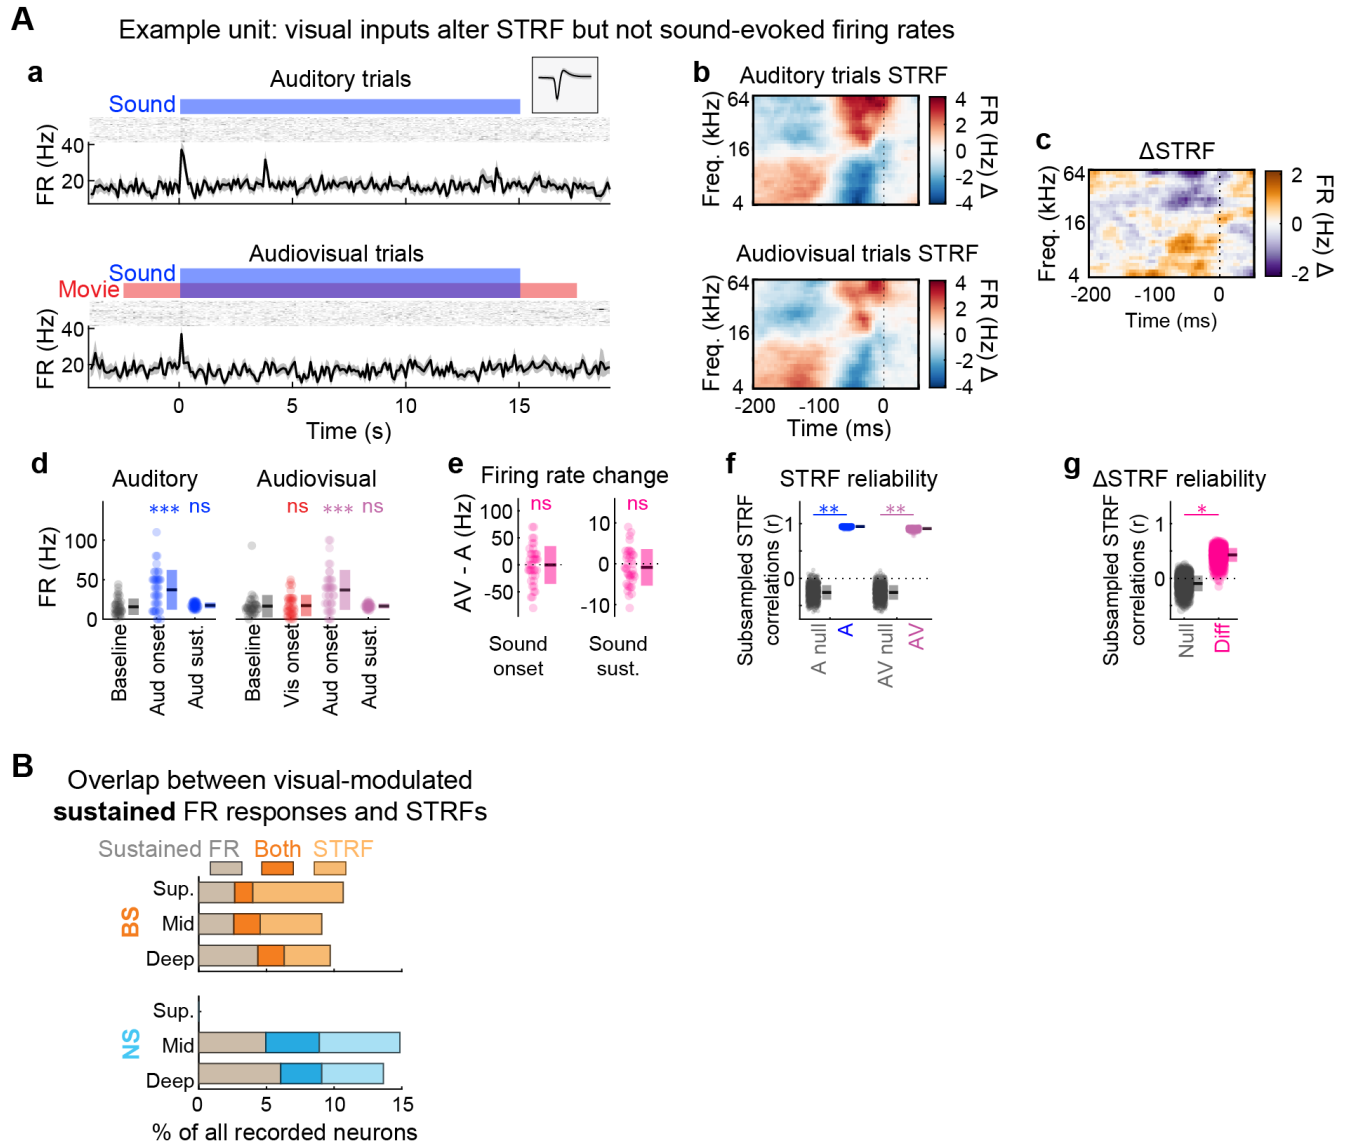

**Figure 10.** Visual stimulation may modify spectrotemporal receptive fields independently of averaged firing rates. **(A)** Example unit with significant  $\Delta$ STRFs reliability but non-significant visual-modulated sustained firing rate. **(a)** Spiking responses quantified by peristimulus time histograms (lower) and binned-spike count matrices (upper) for each condition with blue and red bars indicating auditory and visual stimulus intervals, respectively (temporal binning: 100ms). Inset shows the unit spike waveform (median  $\pm$  MAD). **(b)** STRFs for each condition **(c)**  $\Delta$ STRF **(d)** Window-averaged firing rate responses, with dots representing single trials and mean  $\pm$  SD across trials indicated to the right. Wilcoxon signed-rank tests (paired): \* $p < 0.05$ , \*\* $p < 0.01$ , \*\*\* $p < 0.001$ , ns  $p > 0.05$ . **(e)** Difference in averaged firing rate responses between conditions (Audiovisual - Auditory trials), with dots representing single trials and mean  $\pm$  SD across trials indicated to the right. Wilcoxon signed-rank tests (paired): \* $p < 0.05$ , \*\* $p < 0.01$ , \*\*\* $p < 0.001$ , ns  $p > 0.05$ . **(f)** STRF reliability for each condition. **(g)**  $\Delta$ STRF reliability. For **(f)** and **(g)**, each dot represents the correlation between STRFs or  $\Delta$ STRFs for a single subsample iteration, with mean  $\pm$  SD across trials indicated to the right. Subsampling test: \* $p < 0.05$ , \*\* $p < 0.01$ , \*\*\* $p < 0.001$ , ns  $p > 0.05$ . **(B)** Significant  $\Delta$ STRF reliability may occur with or without significant visual modulation of sustained sound-evoked firing rate changes. Bar plots indicate intersections of significant visual modulated sustained firing rate responses alone, significant  $\Delta$ STRF reliability alone, or both.

Running head: VISUAL MODULATION OF A1 RECEPTIVE FIELDS

662 *Visual context may alter STRF gain but preserves spectrotemporal tuning*

663

664 In the previous sections, we found that STRFs are sensitive to visual context for some units as  
665 indicated by the reliability of  $\Delta$ STRFs. This metric confirmed that the STRFs differed significantly  
666 between conditions but did not reveal what was different about the STRFs, qualitatively or  
667 quantitatively. We therefore examined the degree to which differences between conditions  
668 reflected gain (quantitative) or tuning changes (qualitative) by calculating slope and correlation  
669 coefficient parameters for time-frequency bin values between conditions. For this analysis, we  
670 included only STRFs for which the reliability index in the auditory condition was  $>0.5$  to ensure  
671 reliable baseline spectrotemporal tuning prior to estimating differences between conditions.  
672 Example units with relatively strong and weak correlations between STRFs in the auditory and  
673 audiovisual conditions are shown in **Figure 11A, a and b**, respectively. As indicated by **Figure**  
674 **11A, c**, STRFs were usually highly correlated between conditions (NS median:  $r = 0.95$ ; BS  
675 median:  $r = 0.90$ ), implying largely preserved spectrotemporal tuning between conditions.  
676 Absolute correlations between auditory STRFs and  $\Delta$ STRFs were similarly high (NS median:  $r =$   
677  $0.73$ ; BS median:  $r = 0.62$ ). This implied audiovisual STRFs were similarly structured, but with  
678 either larger or smaller time-frequency bin values than auditory STRFs for units with positive  
679 and negative correlations between auditory STRFs and  $\Delta$ STRFs, respectively.

680 Changes in STRF gain were modeled using standardized major axis regression, which is  
681 designed for capturing bivariate relationships with estimation error affecting both variables  
682 (Warton et al., 2006). With the auditory and audiovisual conditions plotted on the x and y axes,  
683 respectively, positive and negative slopes for the regression model implied that visual  
684 stimulation increased and decreased gain, respectively. Slopes were only analyzed for units for  
685 which the relationship between conditions could be modeled with high accuracy ( $r^2 > 0.5$ ).  
686 STRFs were first downsampled by a factor of three in both dimensions to avoid inflating  
687 correlations between conditions resulting from the smoothing operation (see Materials and  
688 Methods). Example units with gain decreases and increases are shown in **Figure 11B, a–b** for  
689 BS units and **Figure 11B, d–e** for NS units. Group data in **Figure 11B, c–f** indicated that gain  
690 changes were diverse, showing both increases and decreases. In extreme cases, gain was  
691 nearly doubled or halved. However, STRFs were highly correlated between conditions even for  
692 units with large gain changes, implying STRF differences were more quantitative than  
693 qualitative. As indicated by the y-axis marginal histogram in **Figure 11B, c**, the median gain  
694 change was not significantly different from one for BS units (Wilcoxon signed-rank test:  $p =$   
695  $0.888$ ), implying units with gain increases and decreases were approximately balanced. A small  
696 effect of borderline significance suggesting an overall tendency toward decreased gain (median  
697  $0.984$ ) was observed for the NS unit population (Wilcoxon signed-rank test:  $p = 0.044$ ).

698

699

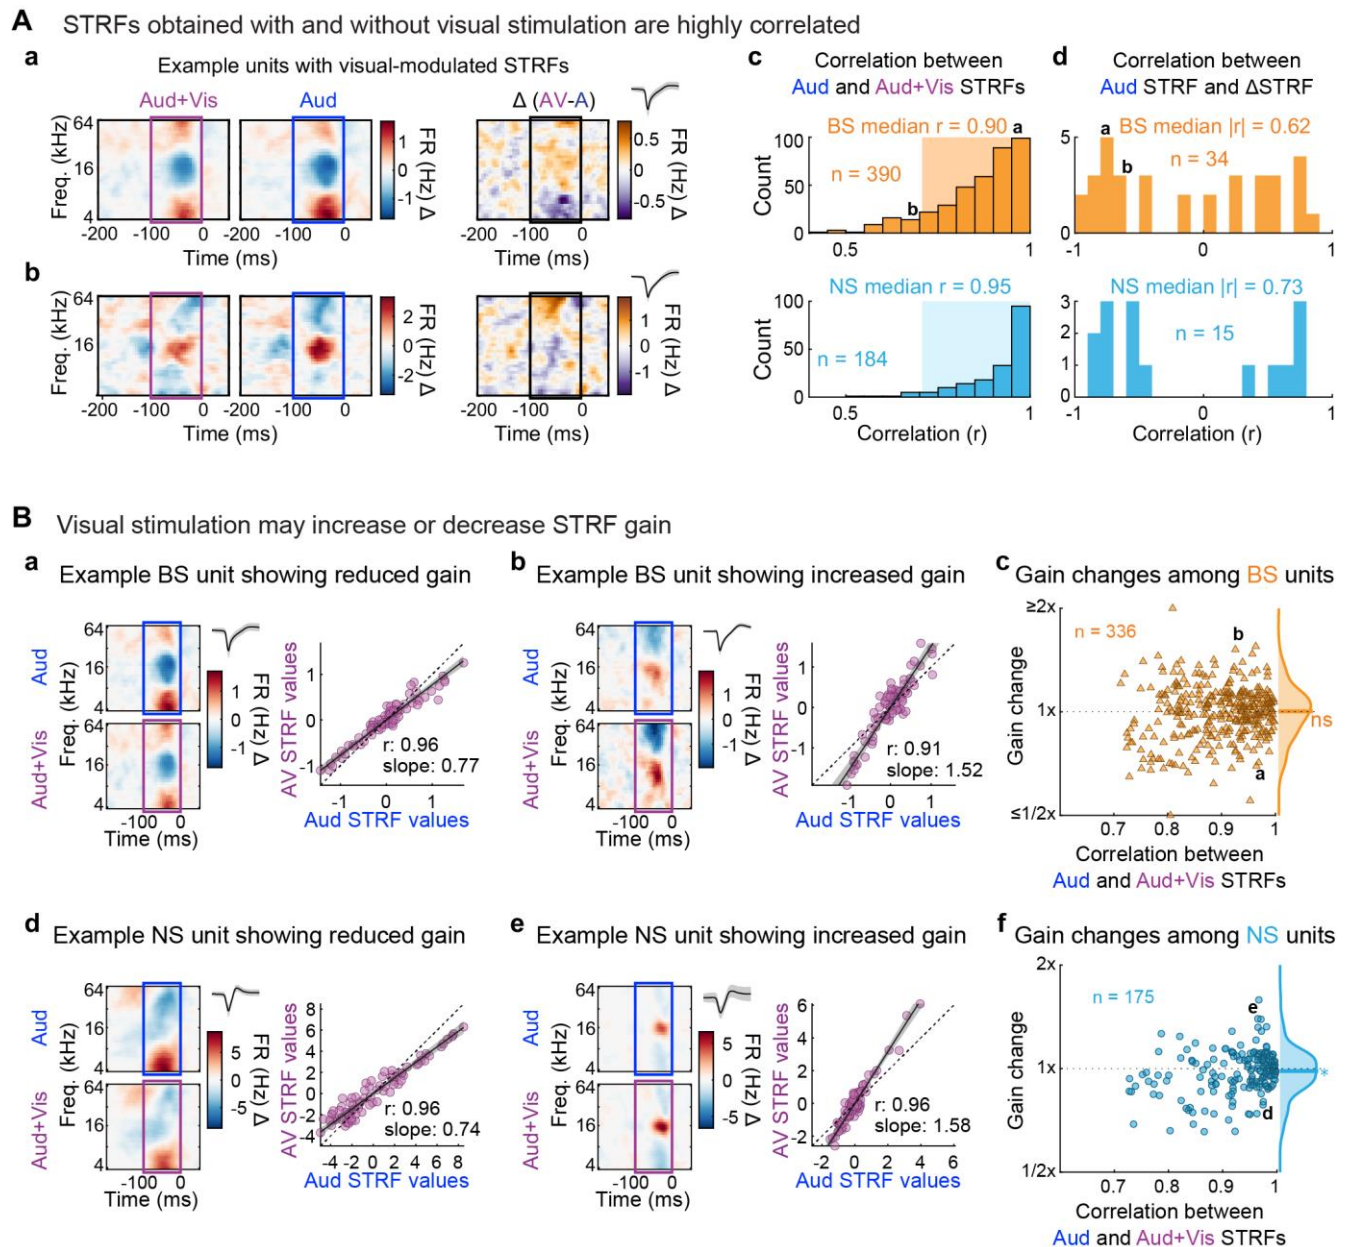

**Figure 11.** Visual stimulation may change STRF response magnitude but preserves spectrotemporal tuning.

**(A)** STRFs obtained with and without visual stimulation are highly correlated. **(a)** Example unit with highly correlated STRFs between conditions. **(b)** Example unit with moderately correlated STRFs between conditions. **(c)** Distributions of STRF correlations between conditions for BS (top) and NS units (bottom), indicating similar spectrotemporal tuning for the majority of units. **(d)** Distributions of correlations between Auditory and  $\Delta$ STRFs for each BS (top) and NS units (bottom).  $\Delta$ STRFs are typically highly correlated or anti-correlated with Auditory STRFs, suggesting visual stimulation produces global increases or decreases in time-frequency bin values without substantial modifications in STRF structure. **(B)** Visual inputs may alter STRF gain without altering spectrotemporal tuning. **(a)** Example BS unit with gain decrease in the Audiovisual condition. Left: STRFs for each condition with unit waveform (median  $\pm$  MAD). Right: best fit lines to STRF time-frequency bins from each condition (shading indicates 95% confidence intervals). **(b)** Example BS unit with gain increase in the Audiovisual condition. Subplot organization as in **(b)**. **(c)** Summary of STRF gain changes between conditions as a function of STRF correlations between conditions for BS units. Values above and below 1 (y-axis) indicate higher or lower gain in the Audiovisual condition, respectively. Deviations from 1 were observed even for units with highly correlated STRFs between conditions. Units with increases and decreases in gain were in approximate balance, such that no significant group-level difference from 1 was observed. **(d–e)** Example NS units with decreased and increased gain and in the Audiovisual condition, with subplot organization as in **(a–b)**. **(f)** Summary of STRF gain changes between conditions as a function of STRF correlations between conditions for NS units. Decreases in gain were significantly more common than increases, such that the unit population median was significantly below 1. Wilcoxon signed-rank tests (paired): \* $p < 0.05$ .



Running head: VISUAL MODULATION OF A1 RECEPTIVE FIELDS

701 *Visual stimulation may increase or decrease auditory information*

702

703 The analysis above showed that STRFs for some neurons either increased or decreased in gain  
704 on audiovisual trials, i.e., showed greater firing rate deviations from the mean driven rate. This  
705 suggested that concurrent visual stimulation may have ‘helped’ or ‘hurt’ encoding of the RDS  
706 sound features by individual neurons. However, gain change analysis was restricted to units for  
707 which STRFs from each condition were highly correlated ( $r^2 > 0.5$ ), which also implied these  
708 units had highly STRF reliability (since an unreliable STRF in one condition would not be well  
709 correlated with the STRF from the other condition). We further explored the idea that visual  
710 stimulation might facilitate or impede encoding of sounds in A1 using an information theoretic  
711 approach to quantify visual-mediated changes in information between the auditory stimulus and  
712 spike events. This analysis was inclusive of all units with at least 200 driven spikes (to avoid  
713 undersampling concerns) regardless of STRF reliability or significance, including potential units  
714 with poorly or randomly structured STRFs in one condition or the other. Because previous  
715 studies have found multisensory interactions are often dependent upon baseline (unimodal)  
716 responses (Allman and Meredith 2007), we further broke down information changes according  
717 to baseline information rates in the auditory condition.

718 As depicted in **Figure 12A, a–c**, similarity between the STRF and stimulus was  
719 quantified by convolution, producing a projection value ( $x$ ) for each time bin used in STRF  
720 calculation. The full sample of projection values defined the distribution  $p(x)$ , which was  
721 standardized by its mean and standard deviation. Relatively high and low projections values  
722 represent stimulus segments that are similar and dissimilar to the STRF, respectively (examples  
723 of each are superimposed over the binned stimulus in **Figure 12A, b**). For auditory responsive  
724 units with significant STRFs, spikes are more likely to occur in time bins with high projection  
725 values, and least likely to occur in bins with low projection values. This can be demonstrated by  
726 identifying the subset of projection values that coincide with spikes, i.e., the distribution  
727  $p(x|\text{spike})$ . As shown in **Figure 12A, d**, values of  $p(x|\text{spike})$  tend to be higher than  $p(x)$  for  
728 positive standardized projection values, implying increased spike probability for closer matches  
729 between the STRF and stimulus. Values of  $p(x|\text{spike})$  moreover tend to be lower than  $p(x)$  for  
730 negative projection values, implying poor matches between the STRF and stimulus result in  
731 spiking probability below the mean firing rate. Mutual information is proportional to the ratio of  
732 these distributions, as defined by pseudocode in **Figure 12A, d**. Intuitively,  $p(x)$  and  $p(x|\text{spike})$   
733 become asymptotically equivalent over time for randomly a spiking neuron but diverge to the  
734 degree to which a neuron is selectively activated by close stimulus approximations to its  
735 receptive field (and suppressed otherwise). Thus, spikes from the example unit in **Figure 12A**  
736 are said to be informative about the stimulus because we can infer that the structure of the  
737 stimulus is relatively similar to the STRF when the ratio between  $p(x|\text{spike})$  and  $p(x)$  is high, and  
738 relatively dissimilar when the ratio is low.

739 A total of 211 NS units and 534 BS units were included in the analysis, reflecting the  
740 subset of the full dataset with at least 200 driven spikes and information values greater than  
741 zero. Example units with visual-mediated decreases and increases in mutual information are  
742 presented in **Figure 12B, a–d**. At the population level, we found that BS units had significantly  
743 higher bits per spike than NS units (**Figure 12C, a**;  $F = 72.17$ ,  $p < 10^{-15}$ ,  $\eta^2 = 0.088$ ). However,  
744 considering BS units tend to have lower firing rates than NS units, we also analyzed information

Running head: VISUAL MODULATION OF A1 RECEPTIVE FIELDS

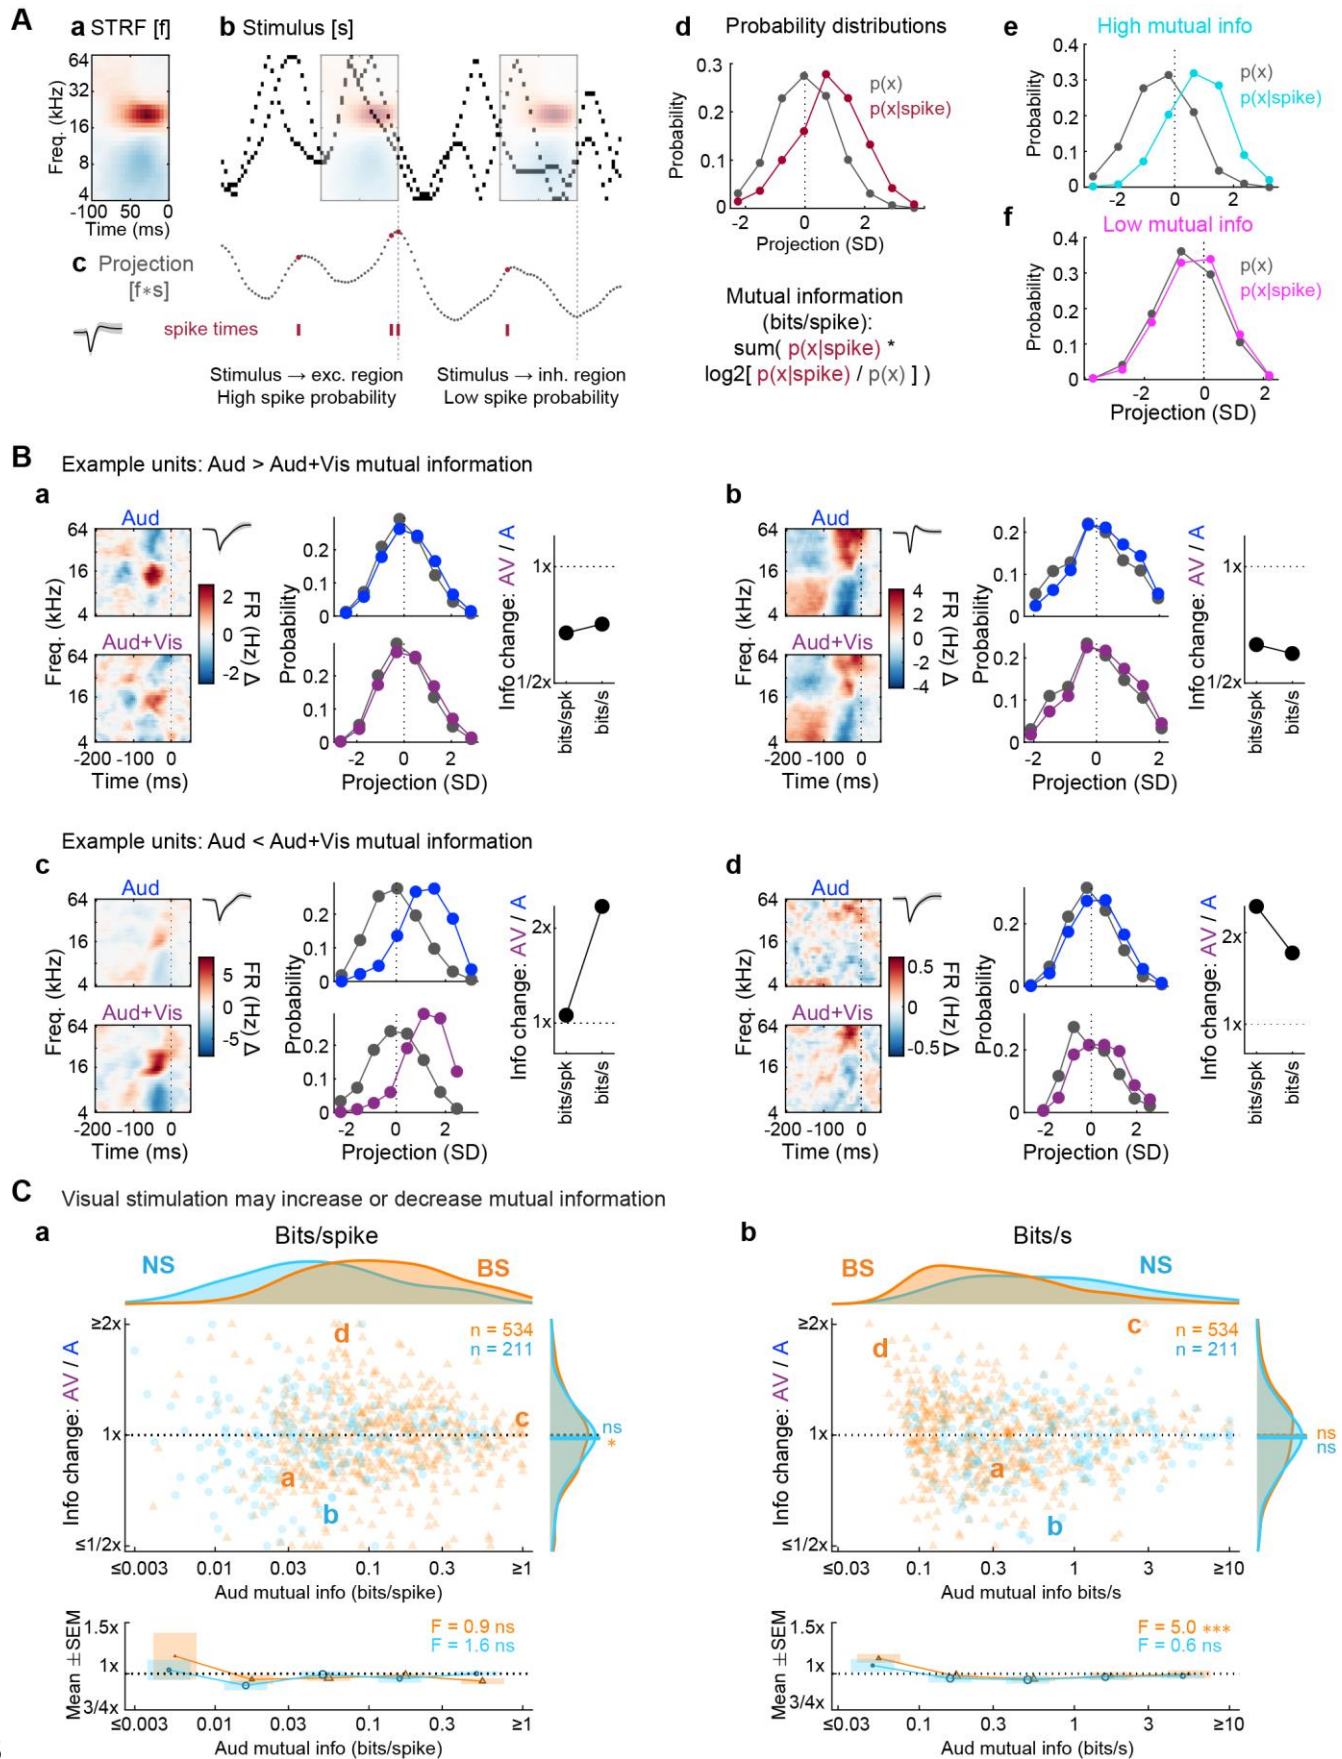

## Running head: VISUAL MODULATION OF A1 RECEPTIVE FIELDS

**Figure 12.** Visual stimulation may increase or decrease information carried about an auditory stimulus. **(A)** Mutual information estimation procedure. **(a)** Example STRF, which serves as filter [f]. **(b)** Example RDS stimulus segment [s]. The overlaid STRFs highlight timepoints at which the RDS frequency vectors intersect excitatory and inhibitory regions of the STRF. **(c)** Projection values (A.U.) for each time point reflecting the convolution of the STRF and stimulus [f\*s]. Relatively high and low projection values result from intersections of stimulus energy with excitatory and inhibitory regions of the STRF. Unit waveform shown at left (median  $\pm$  MAD). **(d)** Distributions of all normalized projection values (gray) and those at time points for which spikes occurred (red). High and low projection values are associated with increases and decreases in spiking probability, respectively. Mutual information between the stimulus (projection value) and response (spike) is estimated from the relationship between these distributions as indicated by the pseudocode below the distributions. **(e–f)** Examples of projection value distributions (hypothetical) which would produce high **(e)** and low **(f)** mutual information values. **(B)** Example units for which visual context decreases and increases mutual information between sound stimuli and spiking responses. **(a–b)** Example units with visual-driven decreases in auditory information. Each example plot includes STRFs (left) and projection value distributions (middle) for each condition, plus an information change summary plot (right) depicting rate changes in both bits/spike and bits/s. Unit waveform shown at to the right of the Auditory STRF (median  $\pm$  MAD). **(c–d)** Example units with visual-driven increases in information, with subplots organized as in (a–b). **(C)** Summary of changes in mutual information with the addition of visual stimulation, as a function of information in Auditory trials. **(a)** Summary of information changes expressed in bits/spike. Across unit populations, bits/spike tended to be higher for BS units (x-axis marginal). As depicted by the scatter plot (top), information changes were highly heterogeneous across both unit types, with both increases and decreases. Letters correspond to example units in (a–d). As indicated by the marginal histograms for the y-axis, a significant group level bias was observed for BS units only (medians shown by colored lines), with a tendency toward decreased information (Wilcoxon signed-rank tests [paired]: \* $p < 0.05$ , ns  $p > 0.05$ ). As indicated by binned means below the x-axis of the scatter plot (mean  $\pm$  SEM), increases and decreases in bits/spike were not significantly dependent upon baseline Auditory information values for either unit type (one-way ANOVA: \* $p < 0.05$ , \*\* $p < 0.01$ , \*\*\* $p < 0.001$ , ns  $p > 0.05$ ). **(b)** Summary of information changes expressed in bits/s. Across unit populations, bits/s tended to be higher for NS units (x-axis marginal). No significant group-level biases were observed for either unit type (y-axis marginal). As indicated by binned means below the x-axis of the scatter plot (mean  $\pm$  SEM), increases in bits/s were more likely for BS units with extremely low Auditory information values, with decreases more likely for moderate to high values. No significant relationship was observed for NS units.

746

747 in terms of bits per second by multiplying the bits/spike value for each unit by its mean firing rate  
748 obtained from the sustained response window (spikes/s). The result indicated significantly  
749 higher bits/s values for NS units (**Figure 12C, b**;  $F = 58.33$ ,  $p < 10^{-13}$ ,  $\eta^2 = 0.072$ ).

750 Changes in information rates for individual units were generally consistent with the gain  
751 change results reported above. Information rates in the audiovisual condition could be either  
752 greater or less than in the auditory condition, for both BS and NS units and for both bits/s and  
753 bits/spike. As indicated by y-axis marginals in **Figure 12C, a**, a small but significant decrease in  
754 median bits/spike was observed for BS units (Wilcoxon signed-rank test:  $p = 0.013$ ) but a similar  
755 trend for NS units was not significant (Wilcoxon signed-rank test:  $p = 0.072$ ). Changes in  
756 bits/spike did not significantly depend upon baseline auditory information rates for either unit  
757 type (BS units:  $F = 0.874$ ,  $p = 0.479$ ,  $\eta^2 = 0.007$ ; NS units:  $F = 1.61$ ,  $p = 0.174$ ,  $\eta^2 = 0.030$ ).  
758 Population level decreases in bits/s were non-significant for both unit types (Wilcoxon signed-  
759 rank tests: BS units:  $p = 0.385$ ; NS units:  $p = 0.067$ ). For BS units, changes in bits/spike  
760 depended significantly upon baseline auditory information rates ( $F = 5.01$ ,  $p < 10^{-3}$ ,  $\eta^2 = 0.037$ ),

## Running head: VISUAL MODULATION OF A1 RECEPTIVE FIELDS

761 such that units with very low auditory information ( $<0.1$  bits/s) on average showed increases in  
762 information transfer with visual stimulation, whereas information for most other units decreased.  
763 A similar relationship was not observed for NS units was not significant ( $F = 0.613$ ,  $p = 0.654$ ,  $\eta^2$   
764  $= 0.012$ ).

765 Considered together, gain and information change analyses produced three insights  
766 about the influence of visual context on sound encoding in A1. First, effects are highly  
767 heterogeneous at the individual unit level, including units with both increases and decreases in  
768 gain and information. Second, population level changes in gain and information in the  
769 audiovisual condition are either subtle or non-significant, and generally reflect decreases  
770 relative to the auditory condition. Third, whether visual context facilitates or interferes with sound  
771 encoding may partially depend on baseline auditory responsiveness.

772

### 773 Discussion

774

775 Perception is inherently multisensory under natural conditions. Environmental events are often  
776 encoded by more than one sensory modality, such as correlated visual and auditory cues  
777 supporting spatial perception and conspecific communication (Sugihara et al., 2006; Allman and  
778 Meredith 2007; Bigelow and Poremba, 2016). Even unisensory events must be encoded within  
779 the context of uncorrelated sensory processing by other modalities. Growing recognition of the  
780 ubiquity of such phenomena has resulted in increased attention to multisensory context within  
781 the sensory physiology community, which has traditionally been dominated by unimodal  
782 paradigms. One of the most important insights from these efforts is that multisensory interaction  
783 is pervasive throughout cortex, including direct anatomical connections and functional  
784 interaction between primary sensory cortices (Ghazanfar and Schroeder, 2006; Bizley et al.,  
785 2007; Banks et al., 2011; Iurilli et al., 2012; Bizley et al., 2016; McClure and Polack 2019). For  
786 instance, a recent study from our lab found that a subset of neurons in awake mouse A1 were  
787 responsive to visual flash stimuli alone, and that these neurons were concentrated in the  
788 infragranular layers (Morrill and Hasenstaub, 2018). These outcomes were replicated and  
789 extended in the present study using the CMN visual stimulus (**Figure 2**), which also confirmed  
790 that both putative inhibitory (NS) and excitatory neurons (BS) can be visually responsive. Of  
791 these, all but a few were also significantly responsive to the RDS sound stimuli (**Figures 3, 5–**  
792 **6**), suggesting purely visual neurons in A1 are very rare.

793 The current study further identified neurons in A1 for which responses to sound were  
794 modulated by visual stimulation (**Figures 7–12**). A major question motivating the present study  
795 was whether there was close overlap between units with such visual-modulated responses and  
796 units responsive to visual stimulation alone. If so, the expected depth distribution of visual-  
797 modulated responses to sound would be similarly concentrated in the deep cortical layers, as  
798 was recently observed in a human imaging study (Gau et al., 2020). We obtained only mixed  
799 support for this hypothesis. Fewer than half of neurons with visual-modulated sound responses  
800 showed significant responses to visual stimulation alone. These outcomes replicate the findings  
801 of previous studies that unimodal visual responses are neither necessary nor sufficient for  
802 visual-modulated responses to sound. Consistent with these observations, the depth  
803 distributions of units with visual-modulated sound responses and units with unimodal visual  
804 responses were, at best, only weakly similar. For instance, in parallel with unimodal visual

## Running head: VISUAL MODULATION OF A1 RECEPTIVE FIELDS

805 responses, we found that visual influences on sound sustained firing responses depended on  
806 cortical depth, with the majority of significant effects in the deepest cortical bin (**Figure 7**).  
807 However, similar depth dependencies were not observed for modulated onset responses or  
808 STRFs. Together, these outcomes support a model of audiovisual integration wherein visual  
809 projections to infragranular A1 drive responses to visual stimulation alone, after which such  
810 activity may modulate sound-evoked responses by propagating throughout cortical layers.

811 By delivering segmented RDS stimuli separated by intertrial intervals, we were able to  
812 estimate time-averaged firing rate changes from baseline reflecting both transient onset  
813 responses and sustained responses throughout the sound period. Moreover, averaging the  
814 binned stimulus values within a window preceding each spike event time enabled estimation of  
815 STRFs, which are sensitive to both spike count and timing with respect to the stimulus.  
816 Capturing each response type turned out to be important both for characterizing responses to  
817 the sounds themselves and for the dependence of these responses on visual context. Notably,  
818 a double dissociation was observed for onset and sustained firing responses, wherein much  
819 stronger baseline deviation effects were observed for onset responses on auditory trials (**Figure**  
820 **3**), but much stronger visual modulation effects were observed for sustained responses on  
821 audiovisual trials (**Figure 7**). We further found that neither firing rate response was necessarily  
822 present in units with significantly reliable STRFs (**Figure 4**). Similarly, only partial overlap was  
823 observed among units with visual-modulated sustained firing rate responses and units with  
824 visually modulated STRFs, even though the spikes entering each analysis were identical  
825 (**Figure 10**). Collectively, these outcomes reinforce previous studies concluding that spike rate  
826 and timing changes in A1 carry non-redundant information about the stimulus (Brugge and  
827 Merzenich, 1973; deCharms and Merzenich 1996; Recanzone, 2000; Lu et al., 2001; Wang et  
828 al., 2005; Malone et al., 2010; Malone et al., 2015; Insanally et al., 2019; Liu et al., 2019).

829 An important caveat regarding onset and sustained firing rate responses in the current  
830 study is that they were elicited by complex, non-repeating stimuli. This aspect of our study  
831 design has at least two implications for the results. First, averaged spike rates within any given  
832 time bin, and across full analysis windows, reflect mixed responses to diverse spectrotemporal  
833 features produced by random draws from the RDS stimulus distribution. Thus, they likely reflect  
834 a combination of weak and strong excitatory responses, as well as suppressed responses  
835 resulting from intersections of spectral energy with receptive field inhibitory sidebands,  
836 refractory periods, and from simultaneous and forward masking effects the stimulus was  
837 designed to produce (Gourévitch et al., 2015). By contrast, binned spike averages elicited by a  
838 repeating RDS stimulus segment would reflect specific spectrotemporal features that drive or  
839 inhibit spiking activity. A neuron without a significant change in averaged sustained firing in a  
840 non-repeating stimulus paradigm may thus exhibit regular temporal patterns of excitation and  
841 suppression in a repeating stimulus paradigm. Second, onset and sustained responses  
842 observed in the current study are not directly comparable to many previous studies examining  
843 diverse firing rate responses in A1 (onset, sustained, offset), the majority of which presented  
844 repeated tone pips, often at the best frequency of the neuron (Brugge and Merzenich, 1973;  
845 Recanzone, 2000; Wang et al., 2005; Malone et al., 2015; Liu et al., 2019). Thus, it cannot be  
846 assumed that onset and sustained responses observed in previous studies would necessarily  
847 be subject to similar asymmetries in terms of visual context modulation. The diverse averaged  
848 firing rate response types observed in the present study are thus qualitatively different from

## Running head: VISUAL MODULATION OF A1 RECEPTIVE FIELDS

849 previous results obtained with repeated tone pips, but nonetheless underscore the same  
850 conclusion that different firing rate responses contain unique information about the stimulus and  
851 are not equivalently sensitive to sensory and other contextual variables.

852 Previous studies of multisensory integration across multiple modalities in a wide range of  
853 cortical and subcortical stations have reported that stimulus encoding may be either facilitated  
854 or impeded by the addition of a second modality (Perrault et al., 2003; Romanski, 2007; Stein  
855 and Stanford 2008; Sugihara et al., 2010; Kobayasi and Riquimaroux, 2013). Similar outcomes  
856 have been obtained with both correlated and uncorrelated bimodal stimulation (Dahl et al.,  
857 2010), with several studies suggesting benefits are more common with correlated stimulation  
858 (Diehl and Romanski, 2014; Meijer et al., 2017). Costs are thought to possibly reflect  
859 competition by each modality over limited spike resources within a given neuron. For example,  
860 in a neuron responsive to two modalities, a subset of the spikes otherwise under the control of a  
861 single modality may instead be driven by a second modality during bimodal stimulation, thus  
862 potentially decreasing the mutual information between spiking and the stimulus of the first  
863 modality. In correlated bimodal stimulus paradigms, such as natural audiovisual speech,  
864 encoding benefits of bimodal stimulation likely reflect synergistic interaction of temporally and/or  
865 spatially coincident feature selectivity within each respective modality. In uncorrelated bimodal  
866 stimulus paradigms, including the present study, improved encoding with the addition of an  
867 uncorrelated signal from another modality may reflect stochastic resonance, in which sensitivity  
868 to a weakly detectable stimulus may be increased even by random noise within or between  
869 modalities (Wiesenfeld and Moss, 1995; Shu et al. 2003; Hasenstaub et al. 2005; Crosse et al.,  
870 2016; Malone et al., 2017). Consistent with this possibility, some evidence obtained in the  
871 present study suggested that auditory information ‘costs’ and ‘benefits’ produced by visual  
872 stimulation were non-randomly distributed with respect to baseline information rates obtained  
873 with auditory stimulation alone. Specifically, information increases for BS units (bits/s) were  
874 most likely for units with the lowest auditory information rates, suggesting weak and inconsistent  
875 responses to sound features may be strengthened and regularized by the additional visual  
876 stimulus. These and similar findings by previous studies establish neural phenomena parallel to  
877 psychophysical experiments reporting significantly improved detection of weakly perceptible  
878 events following the addition of both correlated and uncorrelated stimulation within a second  
879 modality (Ward et al., 2010; Huang et al., 2017; Gleiss and Kayser, 2014; Krauss et al., 2018).

880 **References**

- 881
- 882 Allman BL, Meredith MA (2007) Multisensory processing in “unimodal” neurons: cross-modal  
883 subthreshold auditory effects in cat extrastriate visual cortex. *J Neurophys* 98:545-549.
- 884 Atencio CA, Schreiner CE (2008) Spectrotemporal processing differences between auditory  
885 cortical fast-spiking and regular-spiking neurons. *J Neurosci* 28(15):3897-3910.
- 886 Atencio CA, Schreiner CE (2013) Stimulus choices for spike-triggered receptive field analysis.  
887 In: Depireux DA, Elhilali M, editors. *Handbook of modern techniques in auditory cortex*.  
888 New York: Nova Biomedical, pp. 61-100.
- 889 Atencio CA, Schreiner CE (2016) Functional congruity in local auditory cortical microcircuits.  
890 *Neuroscience* 316:402-419.
- 891 Atencio CA, Sharpee TO, Schreiner CE (2008) Cooperative nonlinearities in auditory cortical  
892 neurons. *Neuron* 58:956-966.
- 893 Atencio CA, Sharpee TO, Schreiner CE (2009) Hierarchical computation in the canonical  
894 auditory cortical circuit. *Proc Natl Acad Sci USA* 106:21894-21899.
- 895 Atilgan H, Town SM, Wood KC, Jones GP, Maddox RK, Lee AK, Bizley JK (2018) Integration of  
896 visual information in auditory cortex promotes auditory scene analysis through  
897 multisensory binding. *Neuron* 97:640-655.
- 898 Banks MI, Uhrich DJ, Smith PH, Krause BM, Manning KA (2011) Descending projections from  
899 extrastriate visual cortex modulate responses of cells in primary auditory cortex. *Cereb*  
900 *Cortex* 21:2620-2638.
- 901 Benjamini Y, Hochberg Y (1995) Controlling the false discovery rate: a practical and powerful  
902 approach to multiple testing. *J R Stat Soc B* 57:289–300.
- 903 Bigelow J, Malone BJ (2017) Cluster-based analysis improves predictive validity of spike-  
904 triggered receptive field estimates. *PLoS ONE* 12:e0183914.
- 905 Bigelow J, Morrill RJ, Dekloe J, Hasenstaub AR (2019) Movement and VIP interneuron  
906 activation differentially modulate encoding in mouse auditory cortex. *eNeuro* 6(5).
- 907 Bigelow J, Poremba A (2016) Audiovisual integration facilitates monkeys’ short-term memory.  
908 *Anim Cogn* 19:799-811.
- 909 Bizley JK, Jones GP, Town SM (2016) Where are multisensory signals combined for perceptual  
910 decision-making?. *Curr Opin Neurobiol* 40:31-37.
- 911 Bizley JK, King AJ (2008) Visual–auditory spatial processing in auditory cortical neurons. *Brain*  
912 *Res* 1242:24-36.
- 913 Bizley JK, Nodal FR, Bajo VM, Nelken I, King AJ (2007) Physiological and anatomical evidence  
914 for multisensory interactions in auditory cortex. *Cereb Cortex* 17:2172-2189.
- 915 Brugge JF, Merzenich MM (1973) Responses of neurons in auditory cortex of the macaque  
916 monkey to monaural and binaural stimulation. *J Neurophys* 36:1138-1158.
- 917 Churchland MM, Byron MY, Cunningham JP, Sugrue LP, Cohen MR, Corrado GS, Newsome  
918 WT, Clark AM, Hosseini P, Scott BB, Bradley DC (2010) Stimulus onset quenches  
919 neural variability: a widespread cortical phenomenon. *Nat Neurosci* 13:369-378.
- 920 Crosse MJ, Di Liberto GM, Lalor EC (2016) Eye can hear clearly now: inverse effectiveness in  
921 natural audiovisual speech processing relies on long-term crossmodal temporal  
922 integration. *J Neurosci* 36:9888-9895.

Running head: VISUAL MODULATION OF A1 RECEPTIVE FIELDS

- 923 Dahl C, Logothetis NK, Kayser C (2010) Modulation of visual responses in the superior temporal  
924 sulcus by audio-visual congruency. *Front Integr Neurosci* 4:10.
- 925 deCharms RC, Blake DT, Merzenich MM (1998) Optimizing sound features for cortical neurons.  
926 *Science* 280:1439-1444.
- 927 deCharms RC, Merzenich MM (1996) Primary cortical representation of sounds by the  
928 coordination of action-potential timing. *Nature* 381:610-613.
- 929 Diehl MM, Romanski LM (2014) Responses of prefrontal multisensory neurons to mismatching  
930 faces and vocalizations. *J Neurosci* 34:11233-11243.
- 931 Dombek DA, Khabbaz AN, Collman F, Adelman TL, Tank DW (2007) Imaging large-scale  
932 neural activity with cellular resolution in awake, mobile mice. *Neuron* 56:43–57.
- 933 Escabí MA, Read HL, Viventi J, Kim DH, Higgins NC, Storage DA, Liu AS, Gifford AM, Burke  
934 JF, Campisi M, Kim YS (2014) A high-density, high-channel count, multiplexed  $\mu$ ECoG  
935 array for auditory-cortex recordings. *J Neurophys* 112:1566-1583.
- 936 Fritz J, Shamma S, Elhilali M, Klein D (2003) Rapid task-related plasticity of spectrotemporal  
937 receptive fields in primary auditory cortex. *Nat Neurosci* 6:1216-1223.
- 938 Gau R, Bazin PL, Trampel R, Turner R, Noppeney U (2020) Resolving multisensory and  
939 attentional influences across cortical depth in sensory cortices. *Elife* 9:e46856.
- 940 Ghazanfar AA, Schroeder CE (2006) Is neocortex essentially multisensory? *Trends Cogn Sci*  
941 10:278-285.
- 942 Gleiss S, Kayser C (2014) Acoustic noise improves visual perception and modulates occipital  
943 oscillatory states. *J Cogn Neurosci* 26:699-711.
- 944 Gourévitch B, Occelli F, Gaucher Q, Aushana Y, Edeline JM (2015) A new and fast  
945 characterization of multiple encoding properties of auditory neurons. *Brain Topogr*  
946 28:379-400.
- 947 Hasenstaub A, Shu Y, Haider B, Kraushaar U, Duque A, McCormick DA (2005) Inhibitory  
948 postsynaptic potentials carry synchronized frequency information in active cortical  
949 networks. *Neuron* 47:423-435.
- 950 Huang J, Sheffield B, Lin P, Zeng FG (2017) Electro-tactile stimulation enhances cochlear  
951 implant speech recognition in noise. *Sci Rep* 7:1-5.
- 952 Insanally MN, Carcea I, Field RE, Rodgers CC, DePasquale B, Rajan K, DeWeese MR,  
953 Albanna BF, Froemke RC (2019) Spike-timing-dependent ensemble encoding by non-  
954 classically responsive cortical neurons. *Elife* 8:e42409.
- 955 Iurilli G, Ghezzi D, Olcese U, Lassi G, Nazzaro C, Tonini R, Tucci V, Benfenati F, Medini P  
956 (2012). Sound-driven synaptic inhibition in primary visual cortex. *Neuron* 73(4):814-828.
- 957 Joachimsthaler B, Uhlmann M, Miller F, Ehret G, Kurt S (2014) Quantitative analysis of neuronal  
958 response properties in primary and higher-order auditory cortical fields of awake house  
959 mice (*Mus musculus*). *Eur J Neurosci* 39:904-918.
- 960 Kayser C, Logothetis NK, Panzeri S (2010) Visual enhancement of the information  
961 representation in auditory cortex. *Curr Biol* 20:19-24.
- 962 Kayser C, Petkov CI, Logothetis NK. Multisensory interactions in primate auditory cortex: fMRI  
963 and electrophysiology. *Hear Res* 258:80-88.
- 964 King AJ, Hammond-Kenny A, Nodal FR (2019) Multisensory processing in the auditory cortex.  
965 In: Lee A, Wallace M, Coffin A, Popper A, Fay R, editors. *Multisensory Processes*.  
966 Springer Handbook of Auditory Research. Springer, Cham. pp. 105-133



Running head: VISUAL MODULATION OF A1 RECEPTIVE FIELDS

- 967 Kleiner M, Brainard D, Pelli D (2007) What's new in Psychtoolbox-3? ECVF Abstr Suppl 14.  
968 Kobayasi KI, Riquimaroux H (2013) Audiovisual integration in the primary auditory cortex of an  
969 awake rodent. *Neurosci Lett* 534:24-29.  
970 Kopp-Scheinflug C, Sinclair JL, Linden JF. When sound stops: offset responses in the auditory  
971 system. *Trends Neurosci* 41:712-728.  
972 Liang Z, Shen W, Sun C, Shou T (2008) Comparative study on the offset responses of simple  
973 cells and complex cells in the primary visual cortex of the cat. *Neuroscience* 156(2):365-  
974 373.  
975 Liu J, Whiteway MR, Sheikhattar A, Butts DA, Babadi B, Kanold PO (2019) Parallel processing  
976 of sound dynamics across mouse auditory cortex via spatially patterned thalamic inputs  
977 and distinct areal intracortical circuits. *Cell Rep* 27:872-885.  
978 Lu T, Liang L, Wang X (2001) Temporal and rate representations of time-varying signals in the  
979 auditory cortex of awake primates. *Nat Neurosci* 4:1131-1138.  
980 Malone BJ, Heiser MA, Beitel RE, Schreiner CE (2017) Background noise exerts diverse effects  
981 on the cortical encoding of foreground sounds. *J Neurophys* 118:1034-1054.  
982 Malone BJ, Scott BH, Semple MN. Temporal codes for amplitude contrast in auditory cortex. *J*  
983 *Neurosci* 30:767-784.  
984 Malone BJ, Scott BH, Semple MN (2015) Diverse cortical codes for scene segmentation in  
985 primate auditory cortex. *J Neurophys* 113:2934-2952.  
986 McClure Jr JP, Polack PO (2019) Pure tones modulate the representation of orientation and  
987 direction in the primary visual cortex. *J Neurophys* 121:2202-2214.  
988 Meijer GT, Montijn JS, Pennartz CM, Lansink CS (2017) Audiovisual modulation in mouse  
989 primary visual cortex depends on cross-modal stimulus configuration and congruency. *J*  
990 *Neurosci* 37:8783-8796.  
991 Morrill RJ, Hasenstaub AR (2018) Visual information present in infragranular layers of mouse  
992 auditory cortex. *J Neurosci* 38:2854-2862.  
993 Niell CM, Stryker MP (2008) Highly selective receptive fields in mouse visual cortex. *J Neurosci*  
994 28:7520-7536.  
995 Niell CM, Stryker MP (2010) Modulation of visual responses by behavioral state in mouse visual  
996 cortex. *Neuron* 65:472-479.  
997 Pachitariu M., Steinmetz N, Kadir S, Carandini M, Kenneth DH (2016) Kilosort: realtime spike-  
998 sorting for extracellular electrophysiology with hundreds of channels. bioRxiv: 061481.  
999 Paxinos G, Franklin KBJ (2019) Paxinos and Franklin's the mouse brain in stereotaxic  
1000 coordinates. Academic press.  
1001 Perrault Jr TJ, Vaughan JW, Stein BE, Wallace MT (2003) Neuron-specific response  
1002 characteristics predict the magnitude of multisensory integration. *J Neurophys* 90:4022-  
1003 4026.  
1004 Phillips EA, Hasenstaub AR (2016) Asymmetric effects of activating and inactivating cortical  
1005 interneurons. *Elife* 5:e18383.  
1006 Phillips EA, Schreiner CE, Hasenstaub AR (2017a) Cortical interneurons differentially regulate  
1007 the effects of acoustic context. *Cell Rep* 20(4):771-8.  
1008 Phillips EA, Schreiner CE, Hasenstaub AR (2017b) Diverse effects of stimulus history in waking  
1009 mouse auditory cortex. *J Neurophys* 118:1376-1393.

Running head: VISUAL MODULATION OF A1 RECEPTIVE FIELDS

- 1010 Recanzone GH (2000) Response profiles of auditory cortical neurons to tones and noise in  
1011 behaving macaque monkeys. *Hear Res* 150:104-118.
- 1012 Romanski LM (2007) Representation and integration of auditory and visual stimuli in the primate  
1013 ventral lateral prefrontal cortex. *Cereb Cortex* 17:i61-69.
- 1014 Rutkowski RG, Shackleton TM, Schnupp JW, Wallace MN, Palmer AR (2002) Spectrotemporal  
1015 receptive field properties of single units in the primary, dorsocaudal and ventrorostral  
1016 auditory cortex of the guinea pig. *Audiol Neurootol* 7:214-227.
- 1017 Schneider DM, Mooney R (2018) How movement modulates hearing. *Annu Rev Neurosci*  
1018 41:553-572.
- 1019 Scholl B, Gao X, Wehr M (2010) Nonoverlapping sets of synapses drive on responses and off  
1020 responses in auditory cortex. *Neuron* 65(3):412-421.
- 1021 See JZ, Atencio CA, Sohal VS, Schreiner CE (2018) Coordinated neuronal ensembles in  
1022 primary auditory cortical columns. *Elife* 7:e35587.
- 1023 Shu Y, Hasenstaub A, Badoual M, Bal T, McCormick DA (2003) Barrages of synaptic activity  
1024 control the gain and sensitivity of cortical neurons. *J Neurosci* 23:10388-10401.
- 1025 Stein BE, Stanford TR (2008) Multisensory integration: current issues from the perspective of  
1026 the single neuron. *Nat Rev Neurosci* 9:255-266.
- 1027 Stringer C, Pachitariu M, Steinmetz N, Reddy CB, Carandini M, Harris KD (2019) Spontaneous  
1028 behaviors drive multidimensional, brainwide activity. *Science* 364(6437).
- 1029 Sugihara T, Diltz MD, Averbek BB, Romanski LM (2006) Integration of auditory and visual  
1030 communication information in the primate ventrolateral prefrontal cortex. *J Neurosci*  
1031 26:11138-11147.
- 1032 Thorson IL, Liénard J, David SV (2015) The essential complexity of auditory receptive fields.  
1033 *PLoS Comput Biol* 11:e1004628.
- 1034 Wang X, Lu T, Snider RK, Liang L (2005) Sustained firing in auditory cortex evoked by preferred  
1035 stimuli. *Nature* 435:341-346.
- 1036 Ward LM, MacLean SE, Kirschner A (2010) Stochastic resonance modulates neural  
1037 synchronization within and between cortical sources. *PLoS ONE* 5:e14371.
- 1038 Warton DI, Wright IJ, Falster DS, Westoby M (2006) Bivariate line-fitting methods for allometry.  
1039 *Biol Rev* 81:259-291.
- 1040 Wiesenfeld K, Moss F (1995) Stochastic resonance and the benefits of noise: from ice ages to  
1041 crayfish and SQUIDS. *Nature* 373:33-36.
- 1042 Wu MC, David SV, Gallant JL (2006) Complete functional characterization of sensory neurons  
1043 by system identification. *Annu Rev Neurosci*. 29:477-505.
